1 **Whole genome sequencing of hepatitis B virus (HBV) using tiled amplicon**  
2 **(HEP-TILE) and probe-based enrichment on Illumina and Nanopore**  
3 **platforms.**

4  
5 Sheila F Lumley<sup>1,2</sup>, Chris Kent<sup>3</sup>, Daisy Jennings<sup>1</sup>, Haiting Chai<sup>1</sup>, George Airey<sup>1</sup>, Elizabeth Waddilove<sup>4</sup>,  
6 Marion Delphin<sup>4</sup>, Amy Trebes<sup>5,6</sup>, Anna L McNaughton<sup>7</sup>, Khadija Said Mohammed<sup>4</sup>, Sam Wilkinson<sup>3</sup>,  
7 Yanxia Wu<sup>5</sup>, George MacIntyre-Cockett<sup>5</sup>, Beatrice Kimono<sup>8</sup>, Moses Kwizera<sup>8</sup>, Kevin Ojambo<sup>8</sup>,  
8 Tongai G Maponga<sup>9</sup>, Catherine de Lara<sup>1</sup>, Jacqueline Martin<sup>2</sup>, James Campbell<sup>4</sup>,  
9 Marije Van Schalkwyk<sup>10</sup>, Dominique Goedhals<sup>11,12</sup>, Robert Newton<sup>8,13</sup>, Eleanor Barnes<sup>1</sup>,  
10 Nicholas J Loman<sup>3</sup>, Paolo Piazza<sup>5</sup>, Joshua Quick<sup>3</sup>, M Azim Ansari\*<sup>1</sup>, Philippa C Matthews\*<sup>4,14,15</sup>

11  
12 \*Joint senior and corresponding authors

13  
14 **Affiliations**

- 15 1. Nuffield Department of Medicine, University of Oxford, Oxford, UK  
16 2. Department of Infectious Diseases and Microbiology, Oxford University Hospitals NHS  
17 Foundation Trust, John Radcliffe Hospital, Oxford, UK  
18 3. Institute of Microbiology and Infection, University of Birmingham, UK  
19 4. The Francis Crick Institute, London, UK  
20 5. Centre for Human Genomics, Nuffield Department of Medicine, University of Oxford, UK  
21 6. Genewiz UK Ltd, Azenta Life Sciences, Stratton Court, Abingdon, UK  
22 7. Population Health Sciences, Bristol Medical School, University of Bristol, UK  
23 8. MRC/UVRI & LSHTM Uganda Research Unit, Entebbe, Uganda  
24 9. Division of Medical Virology, Stellenbosch University / National Health Laboratory Service  
25 Tygerberg, Cape Town, South Africa  
26 10. Division of Infectious Diseases, Department of Medicine, Stellenbosch University, Cape Town,  
27 South Africa  
28 11. University of the Free State, Bloemfontein, South Africa  
29 12. PathCare, Pretoria, South Africa  
30 13. Department of Health Sciences, University of York, UK  
31 14. Division of Infection and Immunity, University College London, London, UK  
32 15. Department of Infection, University College London Hospitals, London, UK

33  
34  
35

36 **Abstract**

37

38 Hepatitis B virus (HBV) whole genome sequencing (WGS) is currently limited as the DNA viral  
39 loads (VL) of many clinical samples are below the threshold required to generate full genomes  
40 using current sequencing methods. We developed two pan-genotypic viral enrichment methods,  
41 using probe-based capture and tiled amplicon PCR (HEP-TILE) for HBV WGS. We demonstrate  
42 using mock samples that both enrichment methods are pan-genotypic (genotypes A-J). Using  
43 clinical samples, we demonstrate that HEP-TILE amplification successfully amplifies full genomes  
44 at the lowest HBV VL tested (30 IU/ml), and the PCR products can be sequenced using both  
45 Nanopore and Illumina platforms. Probe-based capture with Illumina sequencing required VL  
46 >300,000 IU/ml to generate full length HBV genomes. The capture-Illumina and HEP-TILE-  
47 Nanopore pipelines had consensus sequencing accuracy of 100% in mock samples with known  
48 DNA sequences. Together, these protocols will facilitate the generation of HBV sequence data,  
49 enabling a more accurate and representative picture of HBV molecular epidemiology, cast light  
50 on persistence and pathogenesis, and enhance understanding of the outcomes of infection and  
51 its treatment.

52

53 **Keywords**

54 Hepatitis B virus (HBV), whole genome sequencing, Nanopore, Illumina

55

56

## 57 Manuscript

58

### 59 1. Introduction

60

61 Worldwide an estimated 254 million people are living with chronic HBV infection (CHB) [1].  
62 Despite the availability of prophylactic vaccines and suppressive antiviral therapies, the annual  
63 toll of approximately 1.1 million HBV-related deaths in 2022 [1] highlights the persistent global  
64 challenge faced. HBV whole genome sequencing (WGS) provides genetic insights into the  
65 pathogen at population and individual levels [2]. At a population level, WGS improves our  
66 understanding and monitoring of HBV drug resistance, vaccine efficacy, diagnostic escape and  
67 tracking of outbreaks. In individuals, WGS has the potential to contribute to personalised  
68 healthcare, e.g. informing modification of antiviral regimens to take into account antiviral  
69 resistance associated mutations (RAMs), and risk-stratified hepatocellular carcinoma (HCC)  
70 surveillance [3].

71

72 There are several challenges associated with HBV WGS. Target enrichment using probe based  
73 capture, HBV specific polymerase chain reaction (PCR) or rolling circle amplification (RCA) [4,5]  
74 is required when performing HBV WGS due to frequently low DNA viral loads (VL) [6], the tiny  
75 genome (3.2kB), and abundant host nucleic acid background. Sequencing low VL samples,  
76 although challenging, is important at both an individual and population level, in order to  
77 understand mechanisms of transmission, persistence, immunological control and clearance,  
78 breakthrough viraemia on treatment, and for characterising occult HBV infection. HBV has ten  
79 distinct genotypes (A–J), with >8% nucleotide divergence, which are geographically distributed  
80 and associated with infection outcomes [7]. This diversity leads to challenges in designing pan-  
81 genotypic capture probes and PCR primers. The structure of the HBV genome also presents  
82 challenges for WGS. In the blood, HBV DNA is present predominantly in a relaxed-circular (rc-  
83 DNA) form, a circular, partially double-stranded (ds)DNA configuration (**Figure 1A**) [8]; neither  
84 positive nor negative DNA strand is continuous.

85

86 We set out to optimise and validate workflows for HBV WGS. Due to limitations in sensitivity of  
87 our RCA protocol [4] (related to difficulty in generating a fully circular template), we initially used  
88 probe-based enrichment, a strategy which has previously been validated across diverse  
89 pathogens [9–11]. The method is based on the design of biotinylated single-stranded DNA  
90 probes, designed to hybridise with target viral sequences within a sequencing library, and  
91 selectively capture HBV DNA, thereby enriching the final library for HBV DNA and increasing on-  
92 target sequencing yield (**Figure 1B**).

93

94 Second, due to limitations in sensitivity of probe-based enrichment, we developed a tiled amplicon  
95 approach for HBV whole genome sequencing (HEP-TILE) (**Figure 1C**) using HBV-specific  
96 primers designed using PrimalScheme3, successor to PrimalScheme [12,13]. PrimalScheme3  
97 includes key updates to allow the generation of WGS from pathogens with circular genomes, with  
98 primers able to deal with greater pathogen diversity. The HBV sequencing wet and dry lab  
99 workflows build on the widely used ARTIC-Network nCoV-2019 sequencing protocol [14] and

100 fieldbioinformatics [15], both of which have been used extensively worldwide during the SARS-  
101 CoV-2 pandemic.

102

103 Scale up of WGS requires development of open access, easily deployable sequencing methods  
104 ideally building on existing infrastructure and expertise. By developing the protocols described  
105 here, we aim to facilitate the generation of HBV sequence data globally, to obtain a more accurate  
106 and representative picture of HBV genetics and molecular epidemiology.

107

108

109

## 110 **2. Methods**

111

112

### 113 **2.1 Samples**

114

#### 115 **2.1.1 Mock samples**

116 We prepared mock HBV samples using plasmids containing ~1.3 copies of the HBV genome  
117 representing genotypes A-J in a pUC57 backbone, (genotypes A-F from [16], G-J designed in-  
118 house and produced by GeneArt) ([Supplementary table 1](#)). We spiked plasmids into non-  
119 infected human serum (Merck, H5667) at a concentration of  $10^5$  plasmid copies/ml.

120

#### 121 **2.1.2 Clinical samples**

122 We used 63 plasma samples collected between 2011-2023 from adults with CHB in three settings:  
123 (1) outpatient clinics in Oxford (UK) [6,17], (2) outpatient clinics in Tygerberg Hospital, Cape Town  
124 (Stellenbosch University) and public sector hospital services in Bloemfontein (University of the  
125 Free State), South Africa [6], and (3) participants of the Uganda Liver Disease Study (Kalungu  
126 District, south west Uganda [18,19]). We selected samples to represent a range of VL and  
127 genotypes; methods were developed iteratively and based on available samples. ([Figure 2](#),  
128 [Supplementary table 2](#)).

129

130 Written informed consent was provided by participants at enrollment. Approval for this work was  
131 provided as follows, all methods were performed in accordance with the relevant protocols:

132

133

134

135

136

137

138

139

140

141 We collected blood samples in EDTA tubes. To separate plasma, we centrifuged whole blood at

142 1800rpm for 10 minutes. We harvested the supernatant and stored it at  $-80^{\circ}\text{C}$ .

143

144 Quantification of HBV DNA VL was performed on the clinically validated Abbott M2000 platform  
145 by Oxford University Hospitals (OUH) diagnostic microbiology laboratory for UK samples, and  
146 with the Cobas Ampliprep/Taqman HBV test for Ugandan and South African samples (performed  
147 by the Clinical Diagnostic Laboratories for MRC/UVRI/LSHTM Research Institute Uganda and  
148 the NHLS Tygerberg Virology Laboratory respectively). VL ranged from 1.5 to > 8.3 log<sub>10</sub> IU/ml  
149 (i.e. above the assay limit of quantification) ([Supplementary table 2](#)).

150

151

### 152 **2.1.3 Host depletion and nucleic acid extraction**

153 For mock and clinical samples initially being enriched by capture, we performed host depletion  
154 with micrococcal nuclease (NEB catalogue number M0247S, 250µl plasma with 1.25µl MNase  
155 and 23.75µl MNase buffer incubated for 20 mins at 37°C) followed by extraction using the  
156 Kingfisher Apex Magmax viral/pathogen nucleic acid isolation kit (two aliquots of MNase-treated  
157 plasma eluted into 50µl of kit elution buffer, combined followed by a SPRIselect bead clean up to  
158 reduce volume to 40µl).

159

160 For samples from UK and Uganda for HEP-TILE Nanopore sequencing, we extracted DNA using  
161 the QIAgen MinElute Virus Spin kit from either 200µL or 400µL input plasma. Double volume  
162 (400µl) extraction was used if VL was <3 log<sub>10</sub> IU/ml (with double volume protease, ethanol and  
163 buffer AL). We used carrier RNA as per manufacturer's instructions, and eluted into 45µl H<sub>2</sub>O.  
164 The sample volume and extraction method used for each sample is detailed in [Supplementary  
165 table 2](#).

166

167

168

### 169 **2.2 Public data for probe/primer design**

170 We based our probe and primer design on downloads of all available HBV non-recombinant whole  
171 genomes from the Hepatitis B Virus Database (HBVdb) [20] on 31st January 2019 for probe  
172 design and 15th February 2024 for primer design ([Supplementary table 3](#)). In addition for HEP-  
173 TILE, genomes for genotypes I and J were sourced from McNaughton et. al [7].

174

175

### 176 **2.3 HBV probe based enrichment**

177

#### 178 **2.3.1. Probe design**

179 We used RaxML [21] with a general time reversible model with Gamma model of rate  
180 heterogeneity (“-m GTRGAMMA” option in RAXML) to infer a maximum likelihood phylogeny of  
181 HBV full genomes. Next, we used RAXML to infer the ancestral sequences and as input we used  
182 the midpoint rooted tree and the sequence of our isolates with the GTRGAMMA option. We used  
183 the ancestral sequence at the root of the tree to design the first set of probes assuming that this  
184 sequence on average has the least amount of divergence relative to all other isolates.

185

186 As the HBV genome is circular, we added 120 bases from the beginning of the ancestral root  
187 sequence to the end of the sequence to ensure that capture probes cover the break point which  
188 is used to present the genome linearly. We then divided the ancestral root sequence into 120  
189 nucleotide (nt) segments with 60 bases overlap which resulted in an initial set of 55 probes  
190 (Figure 1B). Genotype G has an insertion of 36 bases relative to other genotypes in the core  
191 gene. As the ancestral root sequence contained this insertion, we also designed a probe of 120  
192 nt which lacked this insertion. Furthermore, genotype D has a deletion of 33 bases in the pre-S1  
193 region relative to all other genotypes. To ensure a probe covers this region for genotype D, we  
194 designed a probe of 120 nt that lacked this region.

195  
196 Our previous work in HCV probe-based sequence capture demonstrated that probes of 120 bases  
197 long can tolerate up to 20% divergence relative to their target sequence before the efficiency of  
198 capture drops [11]. To ensure that the designed probes are within a maximum of 20% divergence  
199 of each viral sequence, we divided the dataset based on genotype and created a consensus  
200 sequence for each genotype. We then aligned the probes to each viral sequence and measured  
201 the proportion of mismatches between each probe and the isolate. For each viral sequence, if a  
202 continuous region of  $\geq 60$  bases diverged from the probe sequences by  $>20\%$ , a new probe was  
203 designed for the region using the genotype consensus sequence. As a quality control step, we  
204 removed any potential sequences that contained an “N” as we assumed that the sequence may  
205 be of low quality. Additionally we counted the number of ambiguous nucleotides and any viral  
206 sequence containing  $\geq 5$  ambiguous nucleotides was also removed. The final probe set contained  
207 74 probes.

208  
209 The probe sequences and the set of HBV genome sequences that were used for their design are  
210 presented in [supplementary table 4](#) and can also be downloaded from the following webpage:  
211 [https://figshare.com/articles/dataset/HBV\\_probe\\_sequences/22127015](https://figshare.com/articles/dataset/HBV_probe_sequences/22127015)

212  
213 **2.3.2. Library preparation, hybrid capture and sequencing protocol**  
214 We prepared libraries for Illumina sequencing using the NEBNext Ultra II FS DNA library  
215 preparation kit (protocol for use with inputs  $<100\text{ng}$ ). We used an input of  $26\mu\text{L}$  extracted DNA for  
216 the fragmentation/end preparation reaction and fragmented for 3 minutes, with a negative  
217 (mastermix only) control. We performed indexing PCR using NEBNext multiplex Oligos UDI and  
218 13 amplification cycles. We pooled the amplified libraries corresponding to each aliquot in  
219 equivolume proportions to generate a final multiplex library. We purified the pool using SPRIselect  
220 beads, eluted into a final volume of  $20\mu\text{L}$  and subsequently quantified using High Sensitivity  
221 dsDNA Qubit assay (Invitrogen) and Agilent 2100 Bioanalyzer high sensitivity DNA protocol.

222  
223 We concentrated a  $4.4\mu\text{g}$  aliquot of the final multiplexed library using the manufacturer’s AMPure  
224 XP Bead DNA concentration protocol, then enriched for HBV using the custom-designed probe  
225 panel (IDT Technologies) and xGen Hybridization and Wash Kit (IDT Technologies) following  
226 manufacturer’s ‘tube protocol’. We amplified the final enriched library (12 cycles on-bead PCR),  
227 repurified (eluting into  $12\mu\text{L}$  EB), quantified using High Sensitivity dsDNA Qubit assay (Invitrogen)  
228 and Agilent 2100 Bioanalyzer high sensitivity DNA protocol, then sequenced on the Miseq v3 with  
229  $2\times 300\text{nt}$  paired-end reads or on a partial lane of Novaseq X  $2\times 150\text{nt}$  paired-end reads.



230

### 231 **2.3.3. Data analysis - capture Illumina pipeline**

232 We trimmed de-multiplexed sequence read-pairs of low-quality bases using QUASR (version  
233 7.01) [22], trimmed adapter sequences with CutAdapt (version 4.8) [23] and Skewer (version  
234 0.2.2) [24] and subsequently discarded if either read had <50bp sequence remaining. We mapped  
235 the cleaned read pairs to human reference genome hg19 using Bowtie2 (version 2.2.4) [25] and  
236 excluded from further analyses. All nonhuman read pairs were mapped using BWA (version  
237 0.7.10) [26,27] to a set of 44 HBV references covering all known HBV genotypes and  
238 subgenotypes to choose an appropriate reference [7]. We chose the HBV reference with the  
239 greatest number of HBV reads mapping to it as the genetically closest reference to the sequenced  
240 isolate. Next, we re-mapped all non-human read pairs to the closest HBV reference. We then  
241 used Picard markduplicates tool (version 1.111) [28] to remove duplicate read pairs (where read  
242 pairs starting in the same place and ending in the same place on the genome are assumed to be  
243 PCR duplicates). A base was called at the consensus level if allele depth was above x5, with HBV  
244 genome coverage calculated by determining the percentage of bases called at the consensus  
245 level.

246

247

## 248 **2.4 HBV tiled amplicon scheme (HEP-TILE)**

249

### 250 **2.4.1 PrimalScheme 3**

251 We developed a pan-genotypic HBV scheme using an early version of PrimalScheme3  
252 (<https://github.com/ChrisgKent/primalscheme3>), the successor to PrimalScheme [13], a web-  
253 based primer design tool for developing multiplex primer schemes. A number of changes were  
254 made in PrimalScheme3 to enable us to generate an overlapping (tiled) amplicon scheme which  
255 covered the circular HBV genome, utilising a number of discrete primers at each position to handle  
256 intraspecies diversity.

257

258 Usually an amplicon scheme results in a short sequence at each end of the reference genome  
259 which is not covered due to primer placement constraints and downstream primer-trimming. With  
260 the conventionally designated 'start site' for the circular HBV genome being within the overlapping  
261 surface and reverse transcriptase genes (**Figure 1**), this results in the loss of epidemiologically  
262 and clinically relevant information. PrimalScheme3 introduces an option to add an amplicon  
263 spanning the start/end of circular genomes, resulting in 100% genome coverage.

264

265 Intra-species diversity has posed an issue for amplicon sequencing, as variation within the primer  
266 binding sites reduces primer binding efficacy. The original PrimalScheme identified conserved  
267 primer binding sites by heavily penalising those with variation within the input genomes. This  
268 approach is effective for closely related genomes, such as outbreak strains, but for diverse inputs  
269 a different approach is needed. PrimalScheme3 handles diversity with the use of 'primer clouds'  
270 i.e. a discrete set of 3'-anchored primers which cover all mutations above a user-specified  
271 frequency, without the use of ambiguous bases. This approach reduces the negative effects of  
272 adding additional primers to a multiplexed PCR, such as primer-primer interactions, and  
273 mispriming.

274

275

#### 276 **2.4.2 Multiplex primer pool design for HBV (HEP-TILE)**

277 We aligned HBVdb HBV genomes from each genotype (A-H) separately using MAFFT [29], and  
278 phylogenetically downsampled each genotype to 0.95 relative tree length using TreeMMer [30].  
279 We combined each downsampled genotype's genomes with genotype I and J sequences from [7],  
280 aligned with MAFFT [29], and input into PrimalScheme3 command line tool, with the options; --  
281 ampliconsize 600, --minbasefreq 0.02, --backtrack and --minoverlap 20.

282

283 Initially, we developed a 500bp, eight amplicon scheme  
284 (<https://labs.primalscheme.com/detail/hbv/500/v1.1.0>) [31], however when trialled, one amplicon  
285 spanning 1700-2000 nt consistently dropped out in samples with VL <5 log<sub>10</sub> IU/ml  
286 (**Supplementary figure 1A and 1B**). We hypothesise that is explained by the structure of HBV  
287 DNA: in low VL samples only rc-DNA is present, which has discontinuities in both the positive and  
288 negative DNA strands in that region leading to amplicon dropout. In contrast, in higher VL  
289 samples, covalently closed circular DNA (cccDNA) is also present in the plasma [32,33]. cccDNA  
290 has continuous positive and negative strands which act as a template for this amplicon. We  
291 identified a suitable location for primers spanning this region, taking into account the structure of  
292 rc-DNA, and re-designed a 600bp primer scheme (hbv/600/v2.1.0) (**Supplementary figure 1C-**  
293 **E**), resulting in a six amplicon scheme with amplicons ~600-715bp long, generating a theoretical  
294 100% HBV genome coverage (**Figure 1C**). This scheme uses 131 primers to cover the HBV  
295 diversity present in our reference dataset.

296

#### 297 **2.4.3 HEP-TILE PCR and sequencing protocol**

298 Amplification and library preparation were performed by adapting the nCoV-2019 LoCost v3  
299 sequencing protocol [14], with the removal of the reverse transcriptase step (full protocol on  
300 protocols.io [34]). Extract from samples with VL >6 log<sub>10</sub> IU/ml were diluted 10 fold prior to PCR.  
301 Negative (mastermix only) controls were added at the PCR and library prep stages. We used the  
302 native barcoding kit SQK-NBD114.96 and R10.4.1 MinION flowcells (Oxford Nanopore  
303 Technologies, ONT), multiplexing up to 96 samples per run and sequencing for 72 hours. For  
304 Illumina sequencing of tiled amplicons, we fragmented the amplicons and performed library  
305 preparation using the NEBNext Ultra II FS DNA kit, multiplexing up to 96 samples per run and  
306 sequenced on a partial lane of Novaseq X 150PE.

307

#### 308 **2.4.4 Data analysis - HEP-TILE Nanopore pipeline**

309 We basecalled reads and demultiplexed data using dorado (0.7). We generated a novel pipeline  
310 hbv-fieldbioinformatics [35] to produce consensus genomes. Reads are mapped against  
311 representative genomes from all genotypes [7], with the genome with the most mapped reads  
312 being selected as the primary reference. To handle the circular genome, an intermediate circular  
313 primary reference genome is created, where the sequence of the circular amplicon is appended  
314 to the 3' end of the reference. Reads are then remapped to the circular reference with minimap2  
315 (2.26), primers are trimmed, followed by variant calling by LongShot and Medaka (0.4.5, 1.11.3).  
316 Variants and read depth for the appended region are then mapped back to their corresponding  
317 position on the original reference. A base was called at the consensus level if allele depth was



318 over x20, with HBV genome coverage calculated by determining the percentage of called  
319 consensus bases.

320

321

#### 322 **2.4.5 Data analysis - HEP-TILE Illumina pipeline**

323 Similar to the capture-based Illumina pipeline, we initially used QUASR (version 7.01) [22] to filter  
324 out poor de-multiplexed sequencing reads. We then trimmed primer sequences by using  
325 CutAdapt (version 4.8) [23] and Skewer (version 0.2.2). Human-like reads were excluded with  
326 Bowtie2 (version 2.2.4) [25]. We extended all 44 HBV genome references by adding their first 300  
327 bases to the end and mapped the remaining non-human reads to these new HBV reference  
328 sequences to identify the genetically closest HBV isolate. In the next two rounds, we mapped the  
329 deduplicated reads to 1) the closest HBV isolate and 2) a fine-tuned consensus sequence based  
330 on mapping in 1). In the final stage, we cut reads that cross the conventional genome end and  
331 combined mappings in the conventional and appended regions. A base was called at the  
332 consensus level if allele depth was over x5, with HBV genome coverage calculated by determining  
333 the percentage of called consensus bases.

334

#### 335 **2.5 Determining clinically relevant mutations**

336 HBV genotypes, including recombinants, were determined using the online NCBI genotyping tool  
337 [36]. Subgenotypes, resistance associated mutations and vaccine escape mutations were called  
338 using the online Geno2pheno HBV tool [37].

339

#### 340 **2.6 Software**

341 Graphs were produced using R version 4.2.2 [38], figures were produced with Biorender with a  
342 licence to publish [39].

343

#### 344 **2.7 Data availability**

345 Sequences for samples where full length genomes were generated were deposited to the  
346 European Nucleotide Archive (ENA) under the study PRJEB79403 for Nanopore data and  
347 PRJEB79773 for Illumina.

348

### 349 **3. Results**

350

#### 351 **3.1 Targeted enrichment with probe based capture**

352

##### 353 **3.1.1 Sequencing mock HBV samples enriched with probe based capture using Illumina**

354 We sequenced 10 mock samples (plasmids with genotypes A-J, 5 log<sub>10</sub> copies/ml) in duplicate,  
355 with/without probe-based capture on the Illumina Novaseq X, libraries were diluted to 10pM and  
356 pooled prior to sequencing. Without capture, a median of 391 (IQR 153 - 1858) HBV reads per  
357 million reads sequenced was generated across 20 mock samples. With capture a median of  
358 563,956 (IQR 397523 - 896635) HBV reads per million reads sequenced was generated  
359 ([Supplementary table 1](#)). Enrichment with probe-based capture led to the generation of full  
360 length HBV consensus sequences for all genotypes ([Figure 3A, Supplementary table 1](#)).

361

### 362 **3.1.2 Sequencing clinical HBV samples enriched with probe based capture using Illumina**

363 We enriched a subset of 23 clinical samples (HBV VL 4.21 to >7.20 log<sub>10</sub> IU/ml, as optimisation  
364 work established ~4 log<sub>10</sub> IU/ml as a conservative estimate for the threshold at which full genomes  
365 could be obtained at x5 depth, (Figure 2) using probe based capture and sequenced the samples  
366 on Illumina Novaseq X. A median of 22,377 (IQR 3267 - 135,184) HBV reads per million reads  
367 sequenced was generated. The relationship between HBV VL and percentage reads on target is  
368 shown in (Figure 4A, 4D). Full length (>98%) genomes at x1 coverage were generated in 18/23  
369 samples, with partial genomes in 5/23. Full length genomes above a minimum x5 read depth  
370 (minimum required by bioinformatic pipeline to call base at the consensus level) were generated  
371 in 7/23 samples, all of which had VL >5.5 log<sub>10</sub> IU/ml (~300,000 IU/ml). Below VL 5.5 log<sub>10</sub> only  
372 partial genomes at x5 depth were generated (Supplementary table 2). The negative controls  
373 had 0% consensus coverage of the HBV genome.

374

## 375 **3.2 Targeted enrichment with HEP-TILE tiled amplicon PCR**

376

### 377 **3.2.1 Sequencing mock HBV samples enriched with HEP-TILE using Nanopore and Illumina**

378 We sequenced the same 10 mock samples in duplicate, enriching using the HEP-TILE tiled  
379 amplicon scheme and sequenced on Nanopore MinION and Illumina Novaseq X. With HEP-TILE  
380 Nanopore a median of 997,016 (IQR 994,669 - 999,427) HBV reads per million reads sequenced  
381 was generated. With HEP-TILE Illumina a median of 977,441 (IQR 963,459 - 982,631) HBV reads  
382 per million reads sequenced was generated (Supplementary table 1). Enrichment with HEP-  
383 TILE led to the generation of full-length HBV sequences across genotypes on both platforms  
384 (Figure 3B, 3C).

385

### 386 **3.2.2 Sequencing clinical HBV samples enriched with HEP-TILE using Nanopore**

387 We enriched a subset of 50 clinical samples (HBV VL 1.50 to >8.23 log<sub>10</sub> IU/ml, Figure 2) using  
388 the HEP-TILE protocol and sequenced on the Nanopore MinION. A median of 779,909 (IQR  
389 590,906 - 676,536) HBV reads per million reads sequenced was generated. The relationship  
390 between HBV VL and percentage reads on target is presented (Figure 4B, 4E).

391

392 Full genome coverage (x1 depth) was generated in 40/50 samples. Full-length HBV consensus  
393 genomes at x20 depth (the minimum required to accurately call a mutation), were generated in  
394 40/50 samples, down to the lowest VL tested (1.5 log<sub>10</sub> IU/ml). Partial genomes were obtained for  
395 the remaining 10 samples. These low coverage samples tended to have lower VL (Figure 4),  
396 although this did not reach statistical significance (p = 0.16, Mann Whitney U test). We did not  
397 observe any relationship between HBV genotype and inability to produce whole genomes  
398 (Supplementary figure 2). The negative controls had 0% consensus coverage of the HBV  
399 genome.

400

### 401 **3.2.3 Sequencing clinical HBV samples enriched with HEP-TILE using Illumina**

402 We selected a subset of 10 samples (based on sample availability) for HEP-TILE amplification,  
403 followed by fragmentation and sequencing on Illumina (Novaseq X 150PE partial lane) (Figure  
404 2). A median of 956,800 (IQR 759,122 - 977,744) HBV reads per million reads sequenced was  
405 generated. The relationship between HBV VL and percentage reads on target is shown in (Figure

406 **4C, 4F**). Full genome coverage (x1 depth) was generated in 7/10 samples. Full-length consensus  
407 HBV genomes (minimum x5 read depth) were generated in 7/10 samples, partial genomes were  
408 obtained for 2/10 samples and the pipeline failed to generate a consensus from 1 sample due to  
409 low read coverage and anomalous mapping mismatches. The negative controls had 0%  
410 consensus coverage of the HBV genome.

411

412

413

### 414 **3.3 Methods comparison**

415

#### 416 **3.3.1 Accuracy of consensus genomes**

417 We sequenced all 10 mock samples using all three workflows, with each sample processed in  
418 duplicate (capture Illumina, HEP-TILE Illumina, HEP-TILE Nanopore). Comparison of consensus  
419 sequences generated from mock samples to the known plasmid sequence, demonstrated 100%  
420 accuracy of consensus genomes produced with capture-Illumina and HEP-TILE Nanopore and  
421 99.98% with HEP-TILE Illumina (**Table 1**). Four samples sequenced with HEP-TILE Illumina had  
422 mismatches or bases designated 'N', however the median number of mismatches and N's was 0.  
423 There were no indels for any of the methods.

424

#### 425 **3.3.2 Comparison of capture vs. HEP-TILE ability to generate whole genomes from high** 426 **viral load clinical samples**

427 We sequenced a subset of 10 clinical samples ( $> 5 \log_{10}$  IU/ml) using all three workflows so that  
428 we could compare the ability of capture vs. HEP-TILE to generate HBV WGS at high VL. At x1  
429 depth, capture-Illumina and HEP-TILE Nanopore generated full genomes in 8/10 samples, with  
430 HEP-TILE Illumina in 7/10 samples. At depths required to confidently call consensus (x5 for  
431 Illumina, x20 for Nanopore), full genomes were generated in 4/10 samples for capture-Illumina,  
432 8/10 for HEP-TILE Nanopore and 7/10 for HEP-TILE Illumina (**Supplementary table 2**).

433

#### 434 **3.4. Determining genotypes from HBV WGS data**

435 We identified samples of genotype A-E, in addition to genotype B/C and D/E recombinants (see  
436 methods) (**Supplementary table 2**). We were able to call polymorphisms at sites of previously  
437 reported resistance associated mutations (RAMs) and vaccine escape mutations (VEMs) [37]  
438 (details in **Supplementary text**).

439

440

441

442

## 443 **4. Discussion**

444

### 444 **4.1 Summary of outputs**

445

445 We have developed two pan-genotypic viral enrichment methods for HBV WGS: HEP-TILE and  
446 probe based capture. Both techniques effectively enrich HBV genomes from all known genotypes  
447 (A-J), as evidenced by application to mock samples, and increase the percentage of sequencing

448 reads mapping to the HBV genome, therefore reducing the amount of sequence data needed to  
449 obtain full genome coverage. We used HBV WGS to call HBV genotypes, including recombinants,  
450 which may be missed with partial-genome sequencing. HEP-TILE capitalises on the rapid global  
451 expansion of technical expertise and infrastructure for amplicon based WGS that occurred during  
452 the SARS-CoV-2 pandemic. Having a toolbox of diverse sequencing methods allows the most  
453 appropriate method to be selected according to local infrastructure, cost and throughput  
454 requirements ([Table 2](#)).

## 455 **4.2 Comparison between methods**

456 HEP-TILE offers the greatest flexibility to sequence across a range of HBV VL, able to sequence  
457 full genomes down to  $1.50 \log_{10}$  IU/ml ( $\sim 30$  IU/ml, lowest tested here), using standard extraction  
458 from 200 $\mu$ L - 400 $\mu$ L plasma. The primers are designed to be pan-genotypic (A-J), unlike other  
459 current schemes designed for genotypes A-E [40,41]. The  $\sim 600$ -715bp amplicons used in HEP-  
460 TILE improve sensitivity compared to single amplicon schemes [42], enhancing sequencing  
461 success from low VL or degraded samples. While HEP-TILE amplicons can be sequenced on  
462 either Nanopore or Illumina, the use of the ONT native barcoding kit described here (ligation  
463 based) rather than ONT rapid barcoding kit or NEB-Ultra-II-FS kit (both requiring fragmentation)  
464 enables the sequencing of whole amplicons. Although shorter amplicon schemes (300-600bp)  
465 can facilitate transfer to Illumina platforms without amplicon fragmentation, HBV diversity and  
466 genome structure prohibit the generation of a shorter pan-genotypic scheme ([Supplementary  
467 figure 1](#)). Generally, shorter amplicons improve sensitivity and platform transferability, however  
468 longer 1-2 amplicon schemes or schemes generating concatenated full genomes are useful for  
469 haplotype reconstruction [4,40]. The use of two primer pools (instead of individual reactions for  
470 each amplicon) simplifies the PCR step and eliminates the need for re-balancing of individual  
471 primer pools post-PCR required by other methods [43].

472 We report percent genome coverage at x1 depth in addition to the percentage of the genome with  
473 consensus calls to allow comparison with other published methods presenting coverage at x1  
474 depth. We use a higher threshold of x20 depth to call bases at a consensus level for Nanopore,  
475 and x5 for Illumina to improve certainty of the consensus base call (higher threshold for Nanopore  
476 used due to the higher error rate of Nanopore sequencing technology).

477 [Table 2](#) compares the costs of each workflow, estimated per sample based on an initial batch of  
478 1000 samples. Cost per sample decreases with multiplexing (e.g. 96 samples for Nanopore, more  
479 possible for Illumina). Due to the initial cost of purchasing capture probes ( $\sim$ £6300 for this panel),  
480 sequencing smaller sample sets with capture becomes prohibitively expensive. Costs for Illumina  
481 sequencing vary significantly depending on whether the option of purchasing a partial lane on a  
482 high throughput platform is available.

## 483 **4.3 Real world application of methods**

484 Although full genome HBV sequencing coverage should be achievable for the majority of samples  
485 using HEP-TILE, if samples at extreme ends of the VL spectrum are pooled on the same run,  
486 uneven read distribution is expected between samples, with loss of coverage for the lowest VL

487 samples. Therefore batching samples by VL and normalising the mass of PCR product being  
488 taken forwards into library preparation is recommended. Viral enrichment by PCR is highly  
489 sensitive to amplicon contamination from previous experiments therefore caution should be taken  
490 to keep work areas, equipment and reagents free of contamination, and multiple negative controls  
491 should be included. To avoid *in-silico* 'contamination' double barcoding is required when  
492 demultiplexing to eliminate chimeric reads which may otherwise lead to mis-assignment of reads  
493 to incorrect barcodes [44]. These wet lab and bioinformatic principles are also applicable to  
494 sequencing other targets.

495 Although our capture approach can be used to improve the efficiency of viral sequencing at VL  
496  $> \sim 5.50 \log_{10}$  IU/ml, its efficacy for producing full-length consensus genomes diminishes at lower  
497 VLs, as observed elsewhere [45]. Additional/alternative host depletion and high volume (e.g. 5ml  
498 [46]) extraction is likely to be required to reliably obtain full consensus genomes using this method  
499 in samples with VL  $< 5.5 \log_{10}$  IU/ml.

#### 500 **4.4 Caveats and limitations**

501 The results presented here are from an iterative set of experiments and protocol development,  
502 rather than a pre-planned head-to-head comparison. This limits the direct comparability of  
503 workflows due to insufficient sample volumes of the original South Africa sample set. This meant  
504 we were unable to sequence all samples using all three enrichment approaches. Furthermore,  
505 the extraction method changed over time. Nevertheless, these data showcase the capabilities of  
506 each workflow.

507 Correlation between VL and percentage genome coverage was more variable than anticipated.  
508 Factors such as storage duration, shipping conditions, and repeated freeze-thaw cycles may all  
509 influence sample quality, although DNA is generally robust. Poor sample quality or inaccurate VL  
510 reporting (different sample/timepoint tested or lab/reporting error) may explain instances where  
511 samples that were initially reported to have high VL yielded lower coverage than expected (e.g.  
512 sample 1116 for which VL was reported as  $5.41 \log_{10}$  IU/ml but on repeat on our sample was  $3$   
513  $\log_{10}$  IU/ml).

514 The probes and primers were designed to be pan-genotypic, however only take into account the  
515 diversity of sequences on HBVdb, which contains relatively few genotype F-H sequences, and  
516 under-represents certain global populations [ref Delphin?]. A strength of our study is the use of  
517 mock samples, which allowed us to assess performance across all genotypes, including rarer  
518 genotypes F-J that were unlikely to be present in our cohorts, however might still be present in  
519 other cohorts globally. Analysis of rarer genotypes is often missing in reports of sequencing  
520 schemes, however will become increasingly important as more HBV WGS is performed from  
521 diverse global regions, and known HBV sequence diversity expands. While we report these  
522 methods as pan-genotypic using mock samples generated from plasmids containing HBV  
523 genotypes A-J, it is important to note that we only tested one variant per genotype. Some  
524 genotypes have multiple subtypes; future studies could test enrichment methods with a wider  
525 range of subgenotypes.

526 Sequencing low VL samples has inherent stochasticity, depending on the presence of viral DNA  
527 in a sample or extract, and assay chemistry. Future work will test HEP-TILE performance at viral  
528 loads  $<1.5 \log_{10}$  IU/ml, using high volume extraction to increase the chance of sampling viral DNA  
529 (e.g. extraction from 5ml serum/plasma [46]), increasing the number of PCR cycles from 35 to 40  
530 and pooling products from PCRs performed in duplicate or triplicate. Future work could compare  
531 the ability of capture or HEP-TILE to accurately quantify low abundance minority variants,  
532 requiring a panel of control material at varying VLs with known variant percentages, sequenced  
533 with multiple technical replicates. Finally, enrichment methods could be trialled on different  
534 sample types, for example liver biopsies where high host background is a challenge.

535

#### 536 **4.5 Conclusion**

537 Collectively, these protocols will facilitate the wider generation of HBV sequence data. This data  
538 will lead to a more accurate and representative global picture of HBV molecular epidemiology,  
539 cast light on persistence and pathogenesis, and enhance understanding of treatment responses  
540 and clinical outcomes. These aspirations align with high profile international goals for elimination  
541 of HBV as a public threat.

542

543

544



## 545 **References**

- 546 1. Global hepatitis report 2024: action for access in low- and middle-income countries.  
547 World Health Organization; 9 Apr 2024 [cited 7 May 2024]. Available:  
548 <https://www.who.int/publications/i/item/9789240091672>
- 549 2. Houldcroft CJ, Beale MA, Breuer J. Clinical and biological insights from viral genome  
550 sequencing. *Nat Rev Microbiol.* 2017;15: 183–192.
- 551 3. Lok AS. Personalized treatment of hepatitis B. *Clin Mol Hepatol.* 2015;21: 1–6.
- 552 4. McNaughton AL, Roberts HE, Bonsall D, de Cesare M, Mokaya J, Lumley SF, et al.  
553 Illumina and Nanopore methods for whole genome sequencing of hepatitis B virus (HBV).  
554 *Sci Rep.* 2019;9: 7081.
- 555 5. Lumley SF, Jennings D, Waddilove E, Trebes A, Delphin M, Downs LO, et al. Pan-  
556 genotypic probe-based enrichment to improve efficiency of Hepatitis B virus sequencing.  
557 *bioRxiv.* 2023. p. 2023.02.20.529276. doi:10.1101/2023.02.20.529276
- 558 6. Downs LO, Vawda S, Bester PA, Lythgoe KA, Wang T, McNaughton AL, et al. Bimodal  
559 distribution and set point HBV DNA viral loads in chronic infection: retrospective analysis of  
560 cohorts from the UK and South Africa. *Wellcome Open Res.* 2020;5: 113.
- 561 7. McNaughton AL, Revill PA, Littlejohn M, Matthews PC, Ansari MA. Analysis of genomic-  
562 length HBV sequences to determine genotype and subgenotype reference sequences. *J*  
563 *Gen Virol.* 2020;101: 271–283.
- 564 8. McNaughton AL, D'Arienzo V, Ansari MA, Lumley SF, Littlejohn M, Revill P, et al.  
565 Insights From Deep Sequencing of the HBV Genome—Unique, Tiny, and Misunderstood.  
566 *Gastroenterology.* 2019;156: 384–399.
- 567 9. Briese T, Kapoor A, Mishra N, Jain K, Kumar A, Jabado OJ, et al. Virome Capture  
568 Sequencing Enables Sensitive Viral Diagnosis and Comprehensive Virome Analysis. *MBio.*  
569 2015;6: e01491–15.
- 570 10. Depledge DP, Palser AL, Watson SJ, Lai IY-C, Gray ER, Grant P, et al. Specific  
571 Capture and Whole-Genome Sequencing of Viruses from Clinical Samples. *PLoS ONE.*  
572 2011. p. e27805. doi:10.1371/journal.pone.0027805
- 573 11. Bonsall D, Ansari MA, Ip C, Trebes A, Brown A, Klenerman P, et al. ve-SEQ:  
574 Robust, unbiased enrichment for streamlined detection and whole-genome sequencing of  
575 HCV and other highly diverse pathogens. *F1000Res.* 2015;4: 1062.
- 576 12. PrimalScheme: primer panels for multiplex PCR. [cited 7 May 2024]. Available:  
577 <https://primalscheme.com/>
- 578 13. Quick J, Grubaugh ND, Pullan ST, Claro IM, Smith AD, Gangavarapu K, et al.  
579 Multiplex PCR method for MinION and Illumina sequencing of Zika and other virus  
580 genomes directly from clinical samples. *Nat Protoc.* 2017;12: 1261–1276.
- 581 14. Quick J. nCoV-2019 sequencing protocol v3 (LoCost) v3. 2020.  
582 doi:10.17504/protocols.io.bp2l6n26rgqe/v3

- 583 15. fieldbioinformatics: The ARTIC field bioinformatics pipeline. Github; Available:  
584 <https://github.com/artic-network/fieldbioinformatics>
- 585 16. Bannister E, Sozzi V, Mason H, Locarnini S, Hardikar W, Revill PA. Analysis of  
586 the in vitro replication phenotype of African hepatitis B virus (HBV) genotypes and  
587 subgenotypes present in Australia identifies marked differences in DNA and protein  
588 expression. *Virology*. 2020;540: 97–103.
- 589 17. Downs LO, Smith DA, Lumley SF, Patel M, McNaughton AL, Mokaya J, et al.  
590 Electronic Health Informatics Data To Describe Clearance Dynamics of Hepatitis B Surface  
591 Antigen (HBsAg) and e Antigen (HBeAg) in Chronic Hepatitis B Virus Infection. *MBio*.  
592 2019;10. doi:10.1128/mBio.00699-19
- 593 18. O'Hara G, Mokaya J, Hau JP, Downs LO, McNaughton AL, Karabarinde A, et al.  
594 Liver function tests and fibrosis scores in a rural population in Africa: a cross-sectional  
595 study to estimate the burden of disease and associated risk factors. *BMJ Open*. 2020;10:  
596 e032890.
- 597 19. Asiki G, Murphy G, Nakiyingi-Miiró J, Seeley J, Nsubuga RN, Karabarinde A, et  
598 al. The general population cohort in rural south-western Uganda: a platform for  
599 communicable and non-communicable disease studies. *Int J Epidemiol*. 2013;42: 129–141.
- 600 20. Hayer J, Jadeau F, Deléage G, Kay A, Zoulim F, Combet C. HBVdb: a  
601 knowledge database for Hepatitis B Virus. *Nucleic Acids Res*. 2013;41: D566–70.
- 602 21. Stamatakis A. RAxML version 8: a tool for phylogenetic analysis and post-  
603 analysis of large phylogenies. *Bioinformatics*. 2014;30: 1312–1313.
- 604 22. Gaidatzis D, Lerch A, Hahne F, Stadler MB. QuasR: quantification and  
605 annotation of short reads in R. *Bioinformatics*. 2015;31: 1130–1132.
- 606 23. Martin M. Cutadapt removes adapter sequences from high-throughput  
607 sequencing reads. *EMBnet.journal*. 2011;17: 10–12.
- 608 24. Jiang H, Lei R, Ding S-W, Zhu S. Skewer: a fast and accurate adapter trimmer  
609 for next-generation sequencing paired-end reads. *BMC Bioinformatics*. 2014;15: 182.
- 610 25. Langmead B, Trapnell C, Pop M, Salzberg SL. Ultrafast and memory-efficient  
611 alignment of short DNA sequences to the human genome. *Genome Biol*. 2009;10: R25.
- 612 26. Li H, Durbin R. Fast and accurate short read alignment with Burrows-Wheeler  
613 transform. *Bioinformatics*. 2009;25: 1754–1760.
- 614 27. Li H. bwa: Burrow-Wheeler Aligner for short-read alignment (see minimap2 for  
615 long-read alignment). Github; Available: <https://github.com/lh3/bwa>
- 616 28. Picard. [cited 25 Jun 2024]. Available: <http://broadinstitute.github.io/picard>
- 617 29. Katoh K, Toh H. Parallelization of the MAFFT multiple sequence alignment  
618 program. *Bioinformatics*. 2010;26: 1899–1900.
- 619 30. Menardo F, Loiseau C, Brites D, Coscolla M, Gygli SM, Rutaihwá LK, et al.  
620 Treemmer: a tool to reduce large phylogenetic datasets with minimal loss of diversity. *BMC*

- 621            Bioinformatics. 2018;19: 164.
- 622            31.            primerschemes/hbv/500/v1.1.0 at main · quick-lab/primerschemes. Github;  
623            Available: [https://github.com/quick-](https://github.com/quick-lab/primerschemes/tree/main/primerschemes/hbv/500/v1.1.0)  
624            [lab/primerschemes/tree/main/primerschemes/hbv/500/v1.1.0](https://github.com/quick-lab/primerschemes/tree/main/primerschemes/hbv/500/v1.1.0)
- 625            32.            Chen Y, Sze J, He M-L. HBV cccDNA in patients' sera as an indicator for HBV  
626            reactivation and an early signal of liver damage. *World J Gastroenterol.* 2004;10: 82–85.
- 627            33.            Takkenberg RB, Zaaijer HL, Molenkamp R, Menting S, Terpstra V, Weegink CJ,  
628            et al. Validation of a sensitive and specific real-time PCR for detection and quantitation of  
629            hepatitis B virus covalently closed circular DNA in plasma of chronic hepatitis B patients. *J*  
630            *Med Virol.* 2009;81: 988–995.
- 631            34.            Lumley S, Kent C, Quick J, Matthews P. HEP-TILE: HBV whole genome  
632            sequencing (nanopore protocol) v1. 2024. doi:10.17504/protocols.io.5jyl82bedl2w/v1
- 633            35.            Creators nickloman Will Rowe<sup>1</sup> Radoslaw Poplawski Stephen Rudd<sup>2</sup> Sam W3  
634            ChrisKBio<sup>3</sup> Andrew Rambaut Trevor Bedford<sup>4</sup> Karthik<sup>5</sup> Jared Simpson Josh Quick<sup>3</sup>  
635            mattloose Show affiliations 1. @grailbio 2. @nanoporetech 3. University of Birmingham 4.  
636            Fred Hutchinson Cancer Research Center 5. The Scripps Research Institute.  
637            ChrisgKent/hbv-fieldbioinformatics: zenodo release. doi:10.5281/zenodo.12626842
- 638            36.            Genotyping. [cited 17 Jun 2024]. Available:  
639            <https://www.ncbi.nlm.nih.gov/projects/genotyping/formpage.cgi>
- 640            37.            Geno2pheno hbv. [cited 17 Jun 2024]. Available:  
641            <https://hbv.geno2pheno.org/index.php>
- 642            38.            Ripley BD. The R project in statistical computing. *MSOR Connect.* 2001;1: 23–  
643            25.
- 644            39.            Scientific image and illustration software. [cited 26 Jun 2024]. Available:  
645            <http://www.biorender.com>
- 646            40.            Stenbäck JB, Schmidt D, Noborg U, Gustafsson J, Norberg P, Andersson ME, et  
647            al. Accurate and cost-efficient whole genome sequencing of hepatitis B virus using  
648            Nanopore. medRxiv. 2024. p. 2024.08.12.24311345. doi:10.1101/2024.08.12.24311345
- 649            41.            Tshiabuila D, Choga W, James SE, Maponga T, Preiser W, van Zyl G, et al. An  
650            Oxford Nanopore Technology-Based Hepatitis B Virus Sequencing Protocol Suitable For  
651            Genomic Surveillance Within Clinical Diagnostic Settings. medRxiv. 2024.  
652            doi:10.1101/2024.01.19.24301519
- 653            42.            Günther S, Li BC, Miska S, Krüger DH, Meisel H, Will H. A novel method for  
654            efficient amplification of whole hepatitis B virus genomes permits rapid functional analysis  
655            and reveals deletion mutants in immunosuppressed patients. *J Virol.* 1995;69: 5437–5444.
- 656            43.            Ringlander J, Andersson ME, Prakash K, Larsson SB, Lindh M. Deep  
657            sequencing of hepatitis B virus using Ion Torrent fusion primer method. *J Virol Methods.*  
658            2022;299: 114315.
- 659            44.            Xu Y, Lewandowski K, Lumley S, Pullan S, Vipond R, Carroll M, et al. Detection

- 660 of Viral Pathogens With Multiplex Nanopore MinION Sequencing: Be Careful With Cross-  
661 Talk. *Front Microbiol.* 2018;9: 2225.
- 662 45. Berg MG, Olivo A, Forberg K, Harris BJ, Yamaguchi J, Shirazi R, et al. Advanced  
663 molecular surveillance approaches for characterization of blood borne hepatitis viruses.  
664 *PLoS One.* 2020;15: e0236046.
- 665 46. Fu MX, Simmonds P, Andreani J, Baklan H, Webster M, Asadi R, et al.  
666 Ultrasensitive PCR system for HBV DNA detection: Risk stratification for occult hepatitis B  
667 virus infection in English blood donors. *J Med Virol.* 2023;95: e29144.
- 668
- 669

## 670 **Funding**

671 This research was funded in whole, or in part, by the Wellcome Trust [220549/Z/20/Z,  
672 206298/B/17/Z, 220171/Z/20/Z]. For the purpose of Open Access, the author has applied a CC  
673 BY public copyright licence to any Author Accepted Manuscript version arising from this  
674 Submission.

675 SFL is funded by a Wellcome Doctoral Training Fellowship (grant number 220549/Z/20/Z).  
676 JQ/NL/CK are funded by the Wellcome Trust through the ARTIC Network Collaborative Award  
677 (Grant number 206298/B/17/Z). MAA is supported by a Sir Henry Dale Fellowship jointly funded  
678 by the Royal Society and Wellcome Trust (220171/Z/20/Z). PCM has funding from the UCLH  
679 NIHR Biomedical Research Centre, and core funding from the Francis Crick Institute (ref  
680 CC2223).

681

## 682 **Author contributions**

683 Conceptualization: SFL, JQ, MAA, PCM

684 Methodology: SFL, CK, DJ, HC, AT

685 Software: CK, HC, SW, JQ, MAA

686 Formal Analysis: CK, HC, SFL

687 Investigation: SFL, CK, DJ, HC, GA, EW, MD, AT, SW, YW, G M-C, MK, KO, JC

688 Resources: BK, TGM, CdL, JM, MVS, DG, RN, EB, PCM

689 Data curation: CK, HC, JQ, MAA

690 Writing (original draft): SL, CK

691 Writing (review and editing): all authors

692 Visualisation: SL, CK

693 Supervision: JQ, MAA, PCM

694 Funding acquisition: SFL, JQ, MAA, PCM

695

## 696 **Data availability statement**

697 Data for this study is available within the manuscript, supplementary table and online links.  
698 Sequences for samples where full length genomes were generated were deposited to the  
699 European Nucleotide Archive (ENA) under the study PRJEB79403 for Nanopore data and  
700 PRJEB79773 for Illumina.

701

## 702 **Competing interests**

703 Chris Kent has received an honorarium from Illumina for a talk on PrimalScheme3

704

705 **Figures**  
706

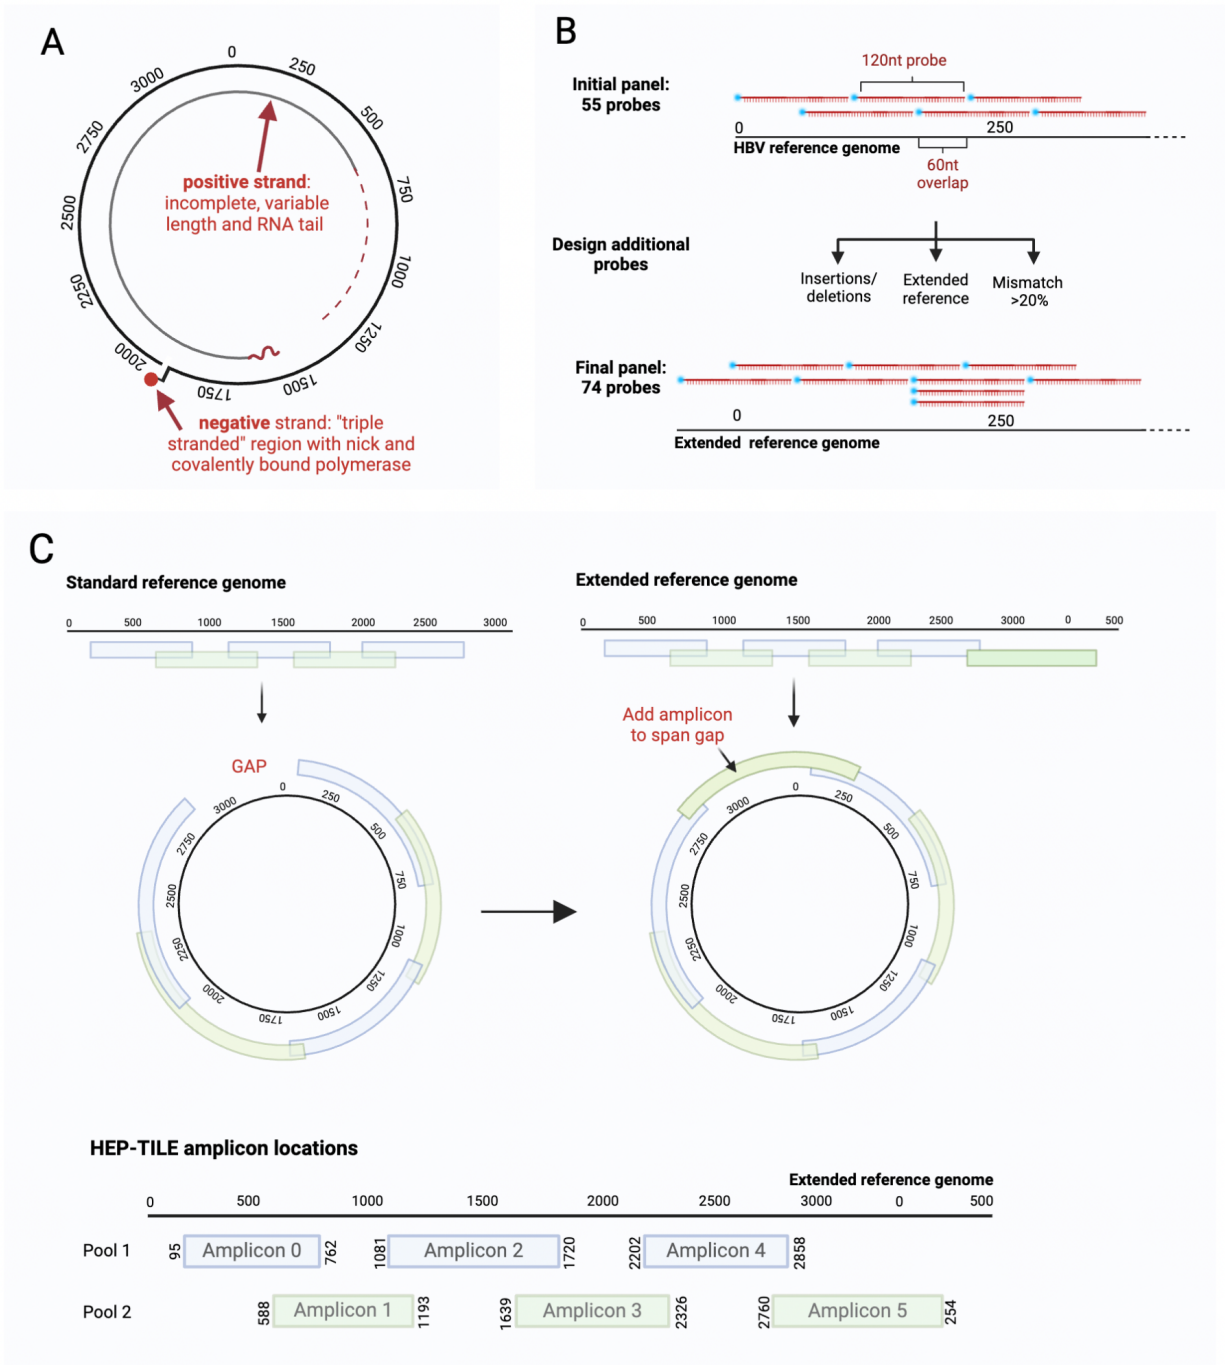

707  
708 **Figure 1: Design of HBV targeted enrichment methods.** (A) HBV genome structure: relaxed  
709 circular DNA (rc-DNA). The complete negative strand is discontinuous, with a 'nick' and covalently  
710 bound polymerase. The positive strand is incomplete with a variable length and RNA tail. (B)  
711 Probe design schematic for HBV probe based enrichment. An initial set of probes are designed  
712 based on non-recombinant whole genomes downloaded from HBVdb. Additional probes are



713 added in regions of high diversity, using an extended reference sequence to account for the  
714 circular genome, and to account for insertions/deletions, then the final probe panel confirmed. (C)  
715 Multiplex tiling PCR for the circular HBV genome. Generation of tiled schemes from linear  
716 reference genomes leaves a gap in coverage for a circular genome. An additional amplicon  
717 spanning the start/end of the linear reference ensures a theoretical maximum 100% genome  
718 coverage can be obtained. Primer positions and amplicon length for HBV tiled amplicon scheme.  
719 Numbering of nt positions based on X02763 reference genome. Created in BioRender. Lumley,  
720 S. (2024) BioRender.com/r40b439  
721  
722  
723

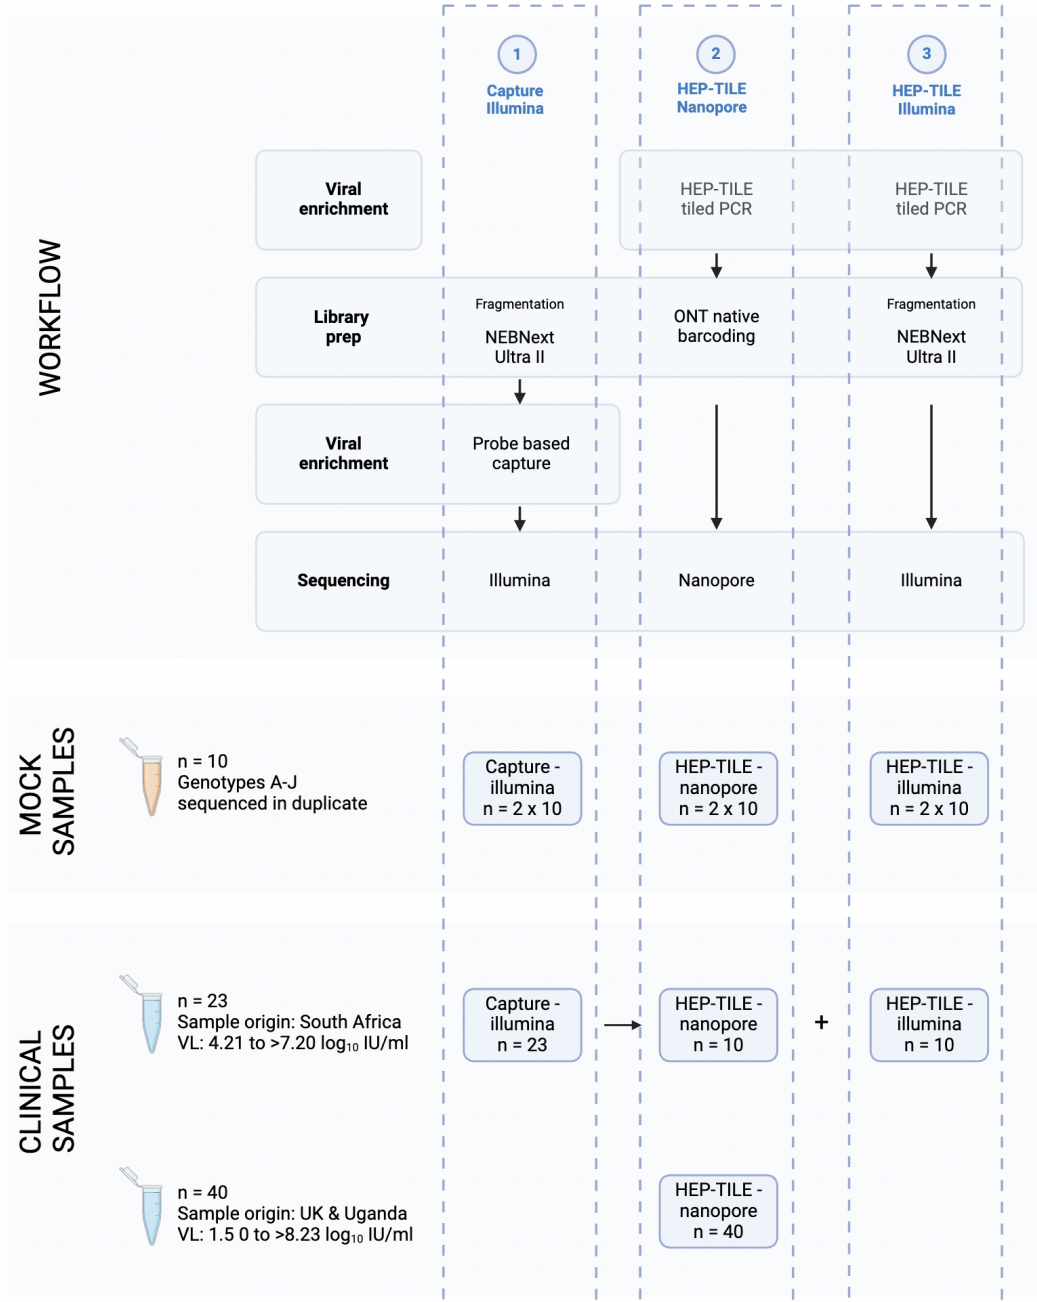

724  
725  
726  
727  
728  
729  
730  
731  
732  
733

**Figure 2: Overview of sequencing workflows.** Numbers of samples sequenced at each stage indicated. Due to sample availability, project stage, and local infrastructure, we used different subsets of samples to validate each method. In the clinical sample set from South Africa, if residual extract was available after capture, two further aliquots were taken forward for HEP-TILE enrichment and sequencing on Nanopore and Illumina. Created in BioRender. Lumley, S. (2024) BioRender.com/k41p399

734

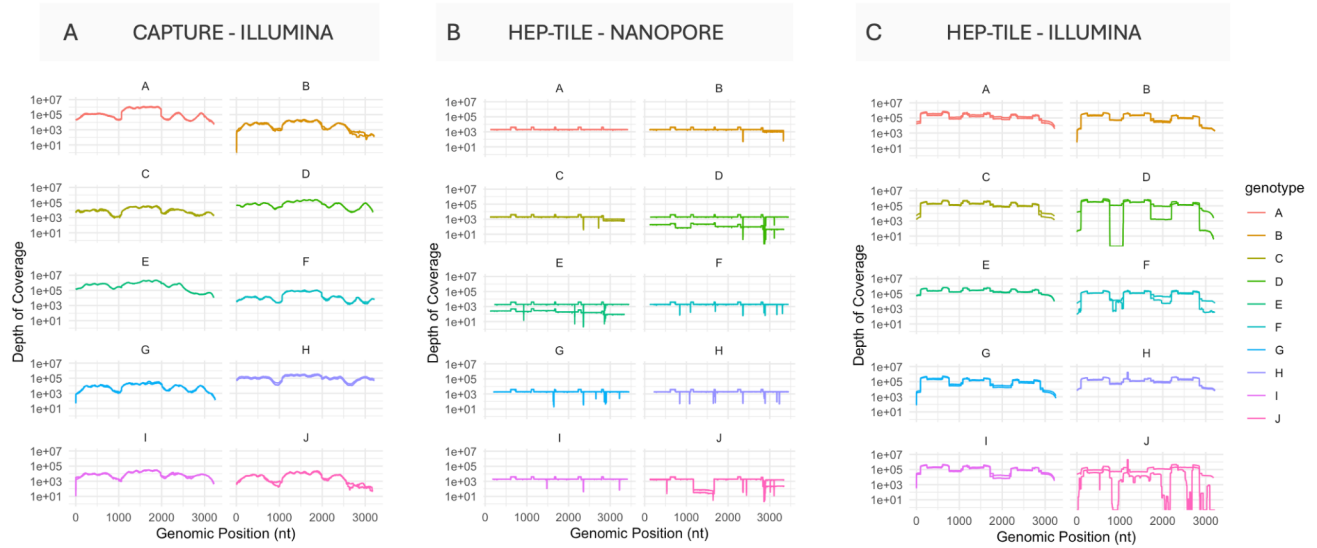

735

736

737 **Figure 3: HBV genomes for all HBV genotypes (A-J) in mock clinical samples enriched**  
738 **using HBV probes and primers (A) Enriched with probe based capture, sequenced on Illumina;**  
739 **(B) Enriched with HEP-TILE, sequenced on Nanopore; (C) Enriched with HEP-TILE, sequenced**  
740 **on Illumina.**

741

742

743

744

745

746

747

748

749

750

751

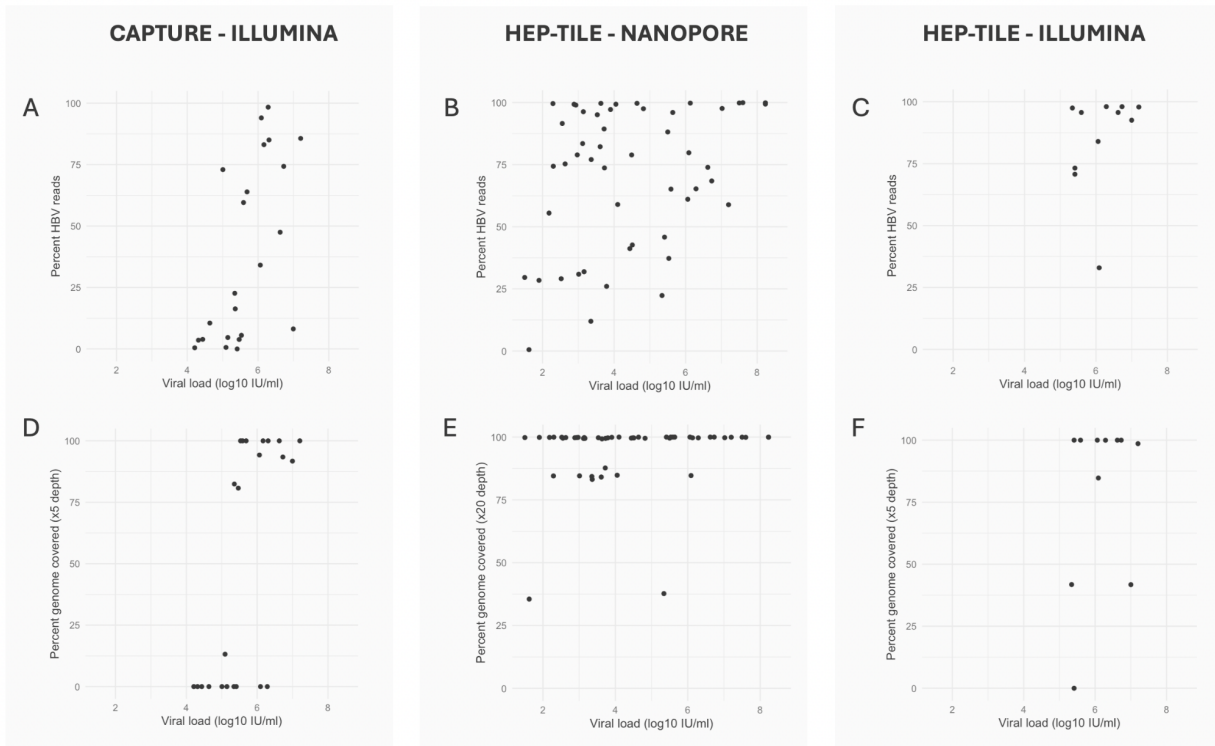

752

753

754

755 **Figure 4: HBV WGS using capture and amplicon based target enrichment.**

756 *Top row:* Relationship between viral load and percentage of reads on-target (ie. HBV) for (A)  
757 probe-based capture sequenced on Illumina, (B) HEP-TILE sequenced on Nanopore and (C)  
758 HEP-TILE sequenced on Illumina.

759 *Bottom row:* Relationship between viral load and percentage of genome with high confidence  
760 consensus for (D) probe-based capture sequenced on Illumina (x5 minimum depth), (E) HEP-  
761 TILE sequenced on Nanopore (x20 minimum depth) and (F) HEP-TILE sequenced on Illumina  
762 (x5 minimum depth). Panels E and F show an outlier with viral load 5.41 log<sub>10</sub> IU/ml, with  
763 disproportionately low percentage genome coverage. Repeat VL was 3 log<sub>10</sub> IU/ml.

764

765

766

767

| Genotype         | Capture - Illumina |         | HEP-TILE - Nanopore |         | HEP-TILE - Illumina |         |
|------------------|--------------------|---------|---------------------|---------|---------------------|---------|
|                  | No. mismatches     | No. N's | No. mismatches      | No. N's | No. mismatches      | No. N's |
| A                | 0                  | 0       | 0                   | 0       | 0                   | 0       |
|                  | 0                  | 0       | 0                   | 0       | 0                   | 0       |
| B                | 0                  | 0       | 0                   | 0       | 0                   | 0       |
|                  | 0                  | 0       | 0                   | 0       | 0                   | 0       |
| C                | 0                  | 0       | 0                   | 0       | 0                   | 0       |
|                  | 0                  | 0       | 0                   | 0       | 0                   | 0       |
| D                | 0                  | 0       | 0                   | 0       | 2                   | 311*    |
|                  | 0                  | 0       | 0                   | 0       | 0                   | 0       |
| E                | 0                  | 0       | 0                   | 0       | 1                   | 0       |
|                  | 0                  | 0       | 0                   | 0       | 0                   | 0       |
| F                | 0                  | 0       | 0                   | 0       | 77                  | 0       |
|                  | 0                  | 0       | 0                   | 0       | 0                   | 0       |
| G                | 0                  | 0       | 0                   | 0       | 0                   | 0       |
|                  | 0                  | 0       | 0                   | 0       | 0                   | 0       |
| H                | 0                  | 0       | 0                   | 0       | 0                   | 0       |
|                  | 0                  | 0       | 0                   | 0       | 0                   | 0       |
| I                | 0                  | 0       | 0                   | 0       | 0                   | 0       |
|                  | 0                  | 0       | 0                   | 0       | 0                   | 0       |
| J                | 0                  | 0       | 0                   | 0       | 1                   | 0       |
|                  | 0                  | 0       | 0                   | 0       | 0                   | 0       |
| Median           | 0                  | 0       | 0                   | 0       | 0                   | 0       |
| Percent accuracy | 100%               |         | 100%                |         | 99.98%              |         |

768

769

770

771

**Table 1: Comparison of sequencing errors when sequencing mock samples using three workflows.**

Each mock sample was sequenced in duplicate, one replicate per row.

\* 311 base dropout of a continuous regio

772

|                                                                       | Capture - Illumina                                                               | HEP-TILE - Nanopore                                                                                         | HEP-TILE - Illumina                                                              |
|-----------------------------------------------------------------------|----------------------------------------------------------------------------------|-------------------------------------------------------------------------------------------------------------|----------------------------------------------------------------------------------|
| <b>Time required for enrichment and library prep</b>                  | 1.5 days<br>(capture overnight)                                                  | 1.5 days<br>(PCR overnight)                                                                                 | 1.5 days<br>(PCR overnight)                                                      |
| <b>Sensitivity (HBV DNA VL) for generating HBV WGS</b>                | > 5.5 log <sub>10</sub> IU/ml                                                    | > 1.5 log <sub>10</sub> IU/ml                                                                               | > 1.5 log <sub>10</sub> IU/ml                                                    |
| <b>Consensus sequence accuracy*</b>                                   | 100%                                                                             | 100%                                                                                                        | 99.98%                                                                           |
| <b>Cost per sample**<br/>(enrichment &amp; library prep reagents)</b> | £29                                                                              | £17                                                                                                         | £25                                                                              |
| <b>Cost per sample***<br/>(sequencing)</b>                            | £25<br>E.g. multiplexed on partial lane on Novaseq X, 1 million reads per sample | £5.60<br>E.g. 96 samples multiplexed per flow cell, bulk purchasing 12 flow cells, 100,000 reads per sample | £2.50<br>E.g. multiplexed on partial lane on Novaseq X, 100,000 reads per sample |
| <b>Throughput</b>                                                     | Platform dependent e.g. Miseq vs. Novaseq X                                      | Platform dependent e.g. Minion vs. Promethion                                                               | Platform dependent e.g. Miseq vs. Novaseq X                                      |
| <b>Portability</b>                                                    | No                                                                               | Yes with MinION                                                                                             | No                                                                               |

773

774

**Table 2: Summary of three HBV WGS pipelines, comparing time, cost and outputs.**

775

All costs are based on cost of reagents in the UK in 2024 (GBP) and do not include staff or equipment costs.

776

\*based on sequencing of mock samples with known sequence

777

\*\* reagent costs for enrichment and library prep reagents calculated in GBP for first 1000 samples. Cost excludes extraction and QC (Qubit/Bioanalyser reagents).

778

779

\*\*\* NB price extremely variable - depends on platform used and whether performing in-house or outsourcing commercially. Excludes hardware (i.e. Laptop/MinION for Nanopore, and Novaseq/Miseq for Illumina)

780

781

782

783

784

785

786

787



788 **Supplementary material**

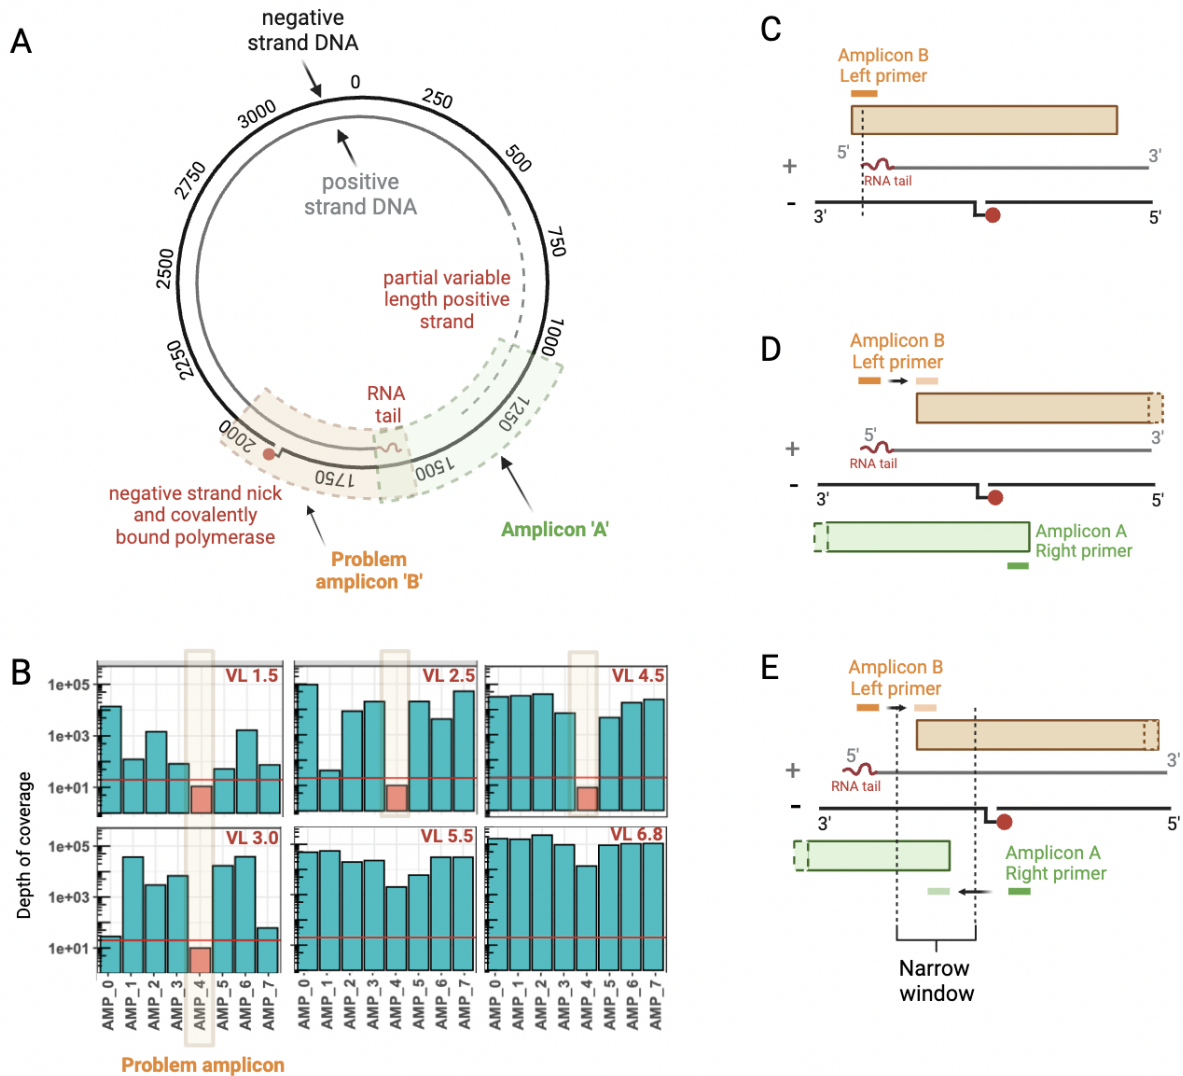

789  
 790 **Supplementary figure 1: Modifications to primer positions to take into account HBV genome**  
 791 **structure.** (A) Schematic of HBV relaxed circular DNA (rc-DNA), the HBV partially dsDNA genome has 5'  
 792 modifications to both the positive DNA strand (RNA tail) and negative DNA strand (covalently bound  
 793 polymerase). The negative strand is complete but not fully circular due to the presence of a 'nick' and  
 794 covalently bound polymerase. The partial positive strand is variable in length. (B) Depth of coverage for  
 795 amplicon scheme hbv/500/v1.1.0 - illustrating drop-out of the 'problem amplicon' (initially Amplicon 4) in  
 796 samples below a VL of 5 log<sub>10</sub> IU/ml (VL shown in red). (C) Amplicon B drops out in low-medium viral load  
 797 samples, the hypothesis is that neither the positive nor negative strands of the HBV relaxed circular genome  
 798 are complete in that region. The left hand primer only partially overlaps the 5' tail of the positive strand, the  
 799 negative strand contains a nick. (D) Attempt to solve issue by moving the amplicon B primer upstream,  
 800 however this has the knock on effect of the Amplicon A right hand primer moving upstream, which now  
 801 means amplicon A falls across a non-continuous DNA region. (E) Solution requires the left hand primer for  
 802 amplicon B and right hand primer for amplicon A to be placed in a narrow 200bp window, to ensure  
 803 Amplicon B can be generated from the positive DNA strand, and amplicon A from the negative DNA strand.  
 804 Created in BioRender. Lumley, S. (2024) BioRender.com/l10u171

805

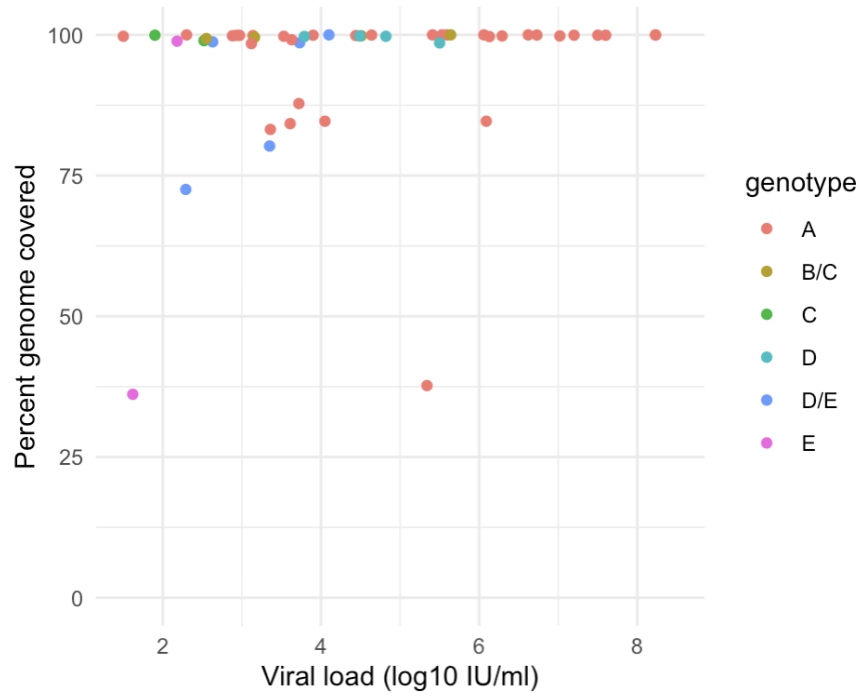

806  
807  
808  
809  
810  
811  
812  
813  
814

**Supplementary figure 2: Relationship between HBV genotype and performance of HEP-TILE Nanopore workflow.** Percentage genome coverage shown at x20 depth.

815  
816  
817

| Genotype | Reference genome | No enrichment - Illumina sequencing |              |                                 |                             |                         | Capture Illumina |              |                                 |                             |                              | HEP-TILE nanopore            |             |              |                                 |                             | HEP-TILE Illumina            |                               |             |              |                                 |                             |                              |                              |
|----------|------------------|-------------------------------------|--------------|---------------------------------|-----------------------------|-------------------------|------------------|--------------|---------------------------------|-----------------------------|------------------------------|------------------------------|-------------|--------------|---------------------------------|-----------------------------|------------------------------|-------------------------------|-------------|--------------|---------------------------------|-----------------------------|------------------------------|------------------------------|
|          |                  | Total reads                         | Mapped reads | HBV reads per million sequenced | Percent reads mapped to HBV | Percent genome coverage | Total reads      | Mapped reads | HBV reads per million sequenced | Percent reads mapped to HBV | Percent genome coverage (x1) | Percent genome coverage (x5) | Total reads | Mapped reads | HBV reads per million sequenced | Percent reads mapped to HBV | Percent genome coverage (x1) | Percent genome coverage (x20) | Total reads | Mapped reads | HBV reads per million sequenced | Percent reads mapped to HBV | Percent genome coverage (x1) | Percent genome coverage (x5) |
| A        | KU736919         | 2564112                             | 10405        | 4058                            | 0.41                        | 100                     | 7703618          | 6846222      | 901683                          | 90.17                       | 100                          | 100                          | 95199       | 94946        | 997342                          | 99.73                       | 100                          | 100                           | 4779606     | 4517282      | 945116                          | 94.51                       | 100                          | 100                          |
|          | not published    | 2135330                             | 7887         | 3694                            | 0.37                        | 100                     | 9257976          | 8358193      | 902810                          | 90.28                       | 100                          | 100                          | 100155      | 100099       | 999441                          | 99.94                       | 100                          | 100                           | 7560102     | 7056345      | 933366                          | 93.34                       | 100                          | 100                          |
| B        |                  | 2545038                             | 330          | 130                             | 0.01                        | 0                       | 511478           | 149377       | 292050                          | 29.2                        | 100                          | 100                          | 79709       | 79284        | 994668                          | 99.47                       | 100                          | 100                           | 5013574     | 4923003      | 981935                          | 98.19                       | 100                          | 100                          |
|          |                  | 2030784                             | 314          | 155                             | 0.02                        | 0                       | 551530           | 172912       | 313513                          | 31.35                       | 100                          | 100                          | 53460       | 53283        | 996689                          | 99.67                       | 100                          | 100                           | 4757802     | 4633475      | 973869                          | 97.39                       | 100                          | 100                          |
| C        | MT111596         | 0                                   | 0            | 0                               | 0.00                        | 0                       | 727296           | 309195       | 425130                          | 42.51                       | 100                          | 100                          | 67502       | 67463        | 999422                          | 99.94                       | 100                          | 100                           | 3920376     | 3773438      | 962519                          | 96.25                       | 100                          | 100                          |
|          |                  | 2819740                             | 449          | 159                             | 0.02                        | 0                       | 667198           | 270331       | 405174                          | 40.52                       | 100                          | 100                          | 50962       | 50937        | 999509                          | 99.95                       | 100                          | 100                           | 4546038     | 4386456      | 964937                          | 96.49                       | 100                          | 100                          |
| D        | NC_003977        | 2594796                             | 3433         | 1323                            | 0.13                        | 100                     | 2359894          | 1997417      | 846401                          | 84.64                       | 100                          | 100                          | 777         | 777          | 1000000                         | 100.00                      | 100                          | 100                           | 7559004     | 7386456      | 977173                          | 97.72                       | 100                          | 100                          |
|          |                  | 1787174                             | 2604         | 1457                            | 0.15                        | 100                     | 2365408          | 1999929      | 845490                          | 84.55                       | 100                          | 100                          | 151565      | 150757       | 994669                          | 99.47                       | 100                          | 100                           | 4595728     | 4581007      | 996797                          | 99.68                       | 90                           | 90                           |
| E        | KU736895         | 2456130                             | 42317        | 17229                           | 1.72                        | 100                     | 17116198         | 16524062     | 965405                          | 96.54                       | 100                          | 100                          | 2310        | 1363         | 590043                          | 59.00                       | 100                          | 100                           | 7866442     | 7537133      | 958137                          | 95.81                       | 100                          | 100                          |
|          |                  | 2050518                             | 36693        | 17895                           | 1.79                        | 100                     | 17556920         | 16941576     | 964951                          | 96.5                        | 100                          | 100                          | 174563      | 174504       | 999662                          | 99.97                       | 100                          | 100                           | 7175694     | 6915732      | 963772                          | 96.38                       | 100                          | 100                          |
| F        | DQ623095         | 2446438                             | 1418         | 580                             | 0.06                        | 98.48                   | 1069550          | 776761       | 726250                          | 72.63                       | 100                          | 100                          | 64275       | 64029        | 996173                          | 99.62                       | 100                          | 100                           | 4011426     | 3770749      | 940002                          | 94                          | 100                          | 100                          |
|          |                  | 1355114                             | 750          | 553                             | 0.06                        | 83.05                   | 981698           | 671782       | 684306                          | 68.43                       | 100                          | 100                          | 68247       | 68081        | 997568                          | 99.76                       | 100                          | 100                           | 4544664     | 4392756      | 966574                          | 96.66                       | 100                          | 100                          |
| G        | AB056513         | 2390922                             | 357          | 149                             | 0.01                        | 0                       | 605598           | 226835       | 374570                          | 37.46                       | 100                          | 100                          | 60886       | 60813        | 998801                          | 99.88                       | 100                          | 100                           | 4868602     | 4790237      | 963702                          | 96.37                       | 100                          | 100                          |
|          |                  | 2030368                             | 334          | 160                             | 0.02                        | 0                       | 708842           | 290037       | 409170                          | 40.92                       | 100                          | 100                          | 78879       | 78761        | 998504                          | 99.85                       | 100                          | 100                           | 4111952     | 4046170      | 984728                          | 98.47                       | 100                          | 100                          |
| H        | FJ356716         | 2382670                             | 4789         | 2010                            | 0.20                        | 100                     | 3247752          | 2906583      | 894952                          | 89.5                        | 100                          | 100                          | 83243       | 82928        | 996216                          | 99.62                       | 100                          | 100                           | 5613544     | 5488416      | 977710                          | 97.77                       | 100                          | 100                          |
|          |                  | 1250400                             | 2260         | 1807                            | 0.18                        | 100                     | 4593134          | 4154349      | 904469                          | 90.45                       | 100                          | 100                          | 95882       | 95846        | 999625                          | 99.96                       | 100                          | 100                           | 5122012     | 5002049      | 980132                          | 98.01                       | 100                          | 100                          |
| I        | AB562463         | 2476292                             | 530          | 214                             | 0.02                        | 0                       | 612856           | 270695       | 441694                          | 44.17                       | 100                          | 100                          | 255721      | 254408       | 994865                          | 99.49                       | 100                          | 100                           | 3159806     | 3103797      | 982275                          | 98.23                       | 100                          | 100                          |
|          |                  | 1342546                             | 308          | 229                             | 0.02                        | 0                       | 538454           | 238861       | 443605                          | 44.36                       | 100                          | 100                          | 289336      | 284791       | 984292                          | 98.43                       | 100                          | 100                           | 4547926     | 4498098      | 989264                          | 98.93                       | 100                          | 100                          |
| J        | AB486012         | 2729238                             | 357          | 131                             | 0.01                        | 0                       | 470730           | 147289       | 312895                          | 31.29                       | 100                          | 100                          | 83559       | 81982        | 981127                          | 98.11                       | 100                          | 100                           | 3057900     | 3038911      | 993136                          | 99.31                       | 100                          | 100                          |
|          |                  | 1779390                             | 248          | 139                             | 0.01                        | 0                       | 474726           | 129406       | 272591                          | 27.26                       | 100                          | 100                          | 553110      | 549429       | 993345                          | 99.33                       | 100                          | 100                           | 3148202     | 3092929      | 982131                          | 98.21                       | 100                          | 100                          |
| Median   |                  | 2259000                             | 640          | 391                             | 0.04                        | 41.525                  | 854497           | 490489       | 563956                          | 56.40                       | 100                          | 100                          | 81476       | 80633        | 997015.76                       | 99.70                       | 100                          | 100                           | 4676765     | 4549145      | 977441                          | 97.75                       | 100                          | 100                          |

818  
819  
820  
821

**Supplementary table 1: Sequencing metrics for mock HBV samples for capture-Illumina, HEP-TILE Nanopore and HEP-TILE Illumina workflows vs. no enrichment**



828

| Genotype | Capture<br>(2019 HBVdb download) |              | HEP-TILE<br>(2024 HBVdb download) |                        |
|----------|----------------------------------|--------------|-----------------------------------|------------------------|
|          | Genomes in<br>HBVdb              | Genomes used | Genomes in<br>HBVdb               | Downsampled<br>Genomes |
| A        | 506                              | 506          | 1066                              | 559                    |
| B        | 1218                             | 1218         | 2018                              | 1143                   |
| C        | 1447                             | 1447         | 3095                              | 1764                   |
| D        | 823                              | 823          | 1523                              | 920                    |
| E        | 254                              | 254          | 397                               | 254                    |
| F        | 197                              | 197          | 304                               | 156                    |
| G        | 28                               | 28           | 50                                | 18                     |
| H        | 26                               | 26           | 28                                | 17                     |

829

830

**Supplementary table 3 - Number of sequences downloaded from publicly available  
sequence database HBVdb[20]**

831

832

833

834

835

836 **Supplementary table 4 - HBV probe sequences**

837  
838 >probe\_1  
839 CTC AACACAGTTCCACCAAGCTCTGCAAGATCCGAGAGTAAGGGCCTGTATTTTCTGCTGGTGGCTCCAGTT  
840 CAGAAACAGAGAACCCTGTTCCGACTATTGCCTCTCTCACATCATC  
841  
842 >probe\_2  
843 TGGTGGCTCCAGTTCAGAAACAGAGAACCCTGTTCCGACTATTGCCTCTCTCACATCATCAATCTTCTCGAAGAC  
844 TGGGGACCCTGCAATGAACATGGAGAACATCACATCAGGACTCCT  
845  
846 >probe\_3  
847 AATCTTCTCGAAGACTGGGGACCCTGCAATGAACATGGAGAACATCACATCAGGACTCCTAGGACCCCTGCTCG  
848 TGTTACAGGCGGGGTGTTTCTTGTTGACAAAAATCCTCACAATACC  
849  
850 >probe\_4  
851 AGGACCCCTGCTCGTGTTACAGGCGGGGTGTTTCTTGTTGACAAAAATCCTCACAATACCGCAGAGTCTAGACT  
852 CGTGGTGGACTTCTCTCAATTTTCTAGGGGGACCACCCGGGTGTCC  
853  
854 >probe\_5  
855 GCAGAGTCTAGACTCGTGGTGGACTTCTCTCAATTTTCTAGGGGGACCACCCGGGTGTCCTGGCCAAAATTCGC  
856 AGTCCCCAACCTCCAATCACTCACCAACCTCCTGTCTCCAACCTG  
857  
858 >probe\_6  
859 TGGCCAAAATTCGCAGTCCCCAACCTCCAATCACTCACCAACCTCCTGTCTCCAACCTGTCCTGGCTATCGCTG  
860 GATGTGTCTGCGGCGTTTTATCATCTTCTTCTCATCCTGCTGCT  
861  
862 >probe\_7  
863 TCCTGGCTATCGCTGGATGTGTCTGCGGCGTTTTATCATCTTCTTCTCATCCTGCTGCTATGCCTCATCTTCTTG  
864 TTGGTTCTTCTGGACTATCAAGGTATGTTGCCCGTTTGTCTCT  
865  
866 >probe\_8  
867 ATGCCTCATCTTCTTGTGGTTCTTCTGGACTATCAAGGTATGTTGCCCGTTTGTCTCTAATTCCAGGATCCACA  
868 ACCACCAGCACGGGACCCTGCAAAACCTGCACGACTCCTGCTCA  
869  
870 >probe\_9  
871 AATTCCAGGATCCACAACCACCAGCACGGGACCCTGCAAAACCTGCACGACTCCTGCTCAAGGAACCTCTATGT  
872 TTCCCTCATGTTGCTGTACAAAACCTTCGGACGGAAATTGCACCTG  
873  
874 >probe\_10  
875 AGGAACCTCTATGTTTCCCTCATGTTGCTGTACAAAACCTTCGGACGGAAATTGCACCTGTATCCCATCCCATC  
876 ATCTTGGGCTTTTCGGAAAATACCTATGGGAGTGGGCCTCAGCCCG  
877  
878 >probe\_11  
879 TATCCCATCCCATCATCTTGGGCTTTTCGGAAAATACCTATGGGAGTGGGCCTCAGCCCGTTTCTCCTGGCTCAG  
880 TTTACTAGTGCAATTTGTTTCACTGGTGCCTAGGGCTTTCCCCAC  
881  
882 >probe\_12  
883 TTTCTCCTGGCTCAGTTTACTAGTGCAATTTGTTCACTGGTGCCTAGGGCTTTCCCCACTGTCTGGCTTTTCACT  
884 TATATGGATGATGTGGTATTGGGGGCCAAATCTGTGCAGCATCTT  
885  
886 >probe\_13  
887 TGTCTGGCTTTCAGTTATATGGATGATGTGGTATTGGGGGCCAAATCTGTGCAGCATCTTGTGCTTATACC  
888 GCTGTTACCAATTTTCTGTTGTCTGTGGGTATACATTTAAACACT  
889



890 >probe\_14  
891 GAGTCCCTTTATACCGCTGTTACCAATTTTCTGTTGTCTGTGGGTATACATTTAAACACTAACAAAACAAAAAGAT  
892 GGGGTTATCCCTAAAATTCATGGGTTATGTAATTGGAAGTTGG  
893  
894 >probe\_15  
895 AACAAAACAAAAAGATGGGGTTATCCCTAAATTCATGGGTTATGTAATTGGAAGTTGGGGGACATTGCCACAA  
896 GAACATATTGTACAAAAAATCAAAGAATGTTTTCGAAAACCTCCT  
897  
898 >probe\_16  
899 GGGACATTGCCACAAGAACATATTGTACAAAAAATCAAAGAATGTTTTCGAAAACCTCCTGTTAATAGGCCTATTG  
900 ATTGGAAAGTCTGTCAACGAATTGTGGGTCTTTTGGGCTTTGCT  
901  
902 >probe\_17  
903 GTTAATAGGCCTATTGATTGAAAAGTCTGTCAACGAATTGTGGGTCTTTTGGGCTTTGCTGCCCTTTTACCCAAT  
904 GTGGTTATCCTGCTCTAATGCCTTTGTATGCATGTATTAAGCT  
905  
906 >probe\_18  
907 GCCCCTTTTACCCAATGTGGTTATCCTGCTCTAATGCCTTTGTATGCATGTATTAAGCTAAGCAGGCTTTTGGCTT  
908 TCTCGCCAACCTACAAGGCCTTTCTCTGTAAACAATACATGAAC  
909  
910 >probe\_19  
911 AAGCAGGCTTTTGGCTTTCTCGCCAACCTACAAGGCCTTTCTCTGTAAACAATACATGAACCTTTACCCCGTTGCTC  
912 GGCAACGGCCAGGCTGTGCCAAGTGTGGCTGACGCAACCCCTT  
913  
914 >probe\_20  
915 CTTTACCCCGTTGCTCGGCAACGGCCAGGCCTGTGCCAAGTGTGGCTGACGCAACCCCACTGGCTGGGGCT  
916 TGGCCATTGGCCATCAGCGCATGCGTGGAACCTTTGTGGCTCCTCTG  
917  
918 >probe\_21  
919 ACTGGCTGGGGCTTGGCCATTGGCCATCAGCGCATGCGTGGAACCTTTGTGGCTCCTCTGCCGATCCATACTGC  
920 GGAACCTCTAGCAGCTTGTTCGCTCGCAGCCGGTCTGGAGCGAAA  
921  
922 >probe\_22  
923 CCGATCCATACTGCGGAACCTCCTAGCAGCTTGTTCGCTCGCAGCCGGTCTGGAGCGAACTTATCGGGACTGA  
924 CAACTCTGTTGTCTCTCTCGGAAGTACACCTCCTTTCCATGGCTG  
925  
926 >probe\_23  
927 CTTATCGGGACTGACAACTCTGTTGTCCTCTCTCGGAAGTACACCTCCTTTCCATGGCTGCTAGGCTGTGCTGCC  
928 AACTGGATCCTGCGCGGGACGTCCTTTGTTTACGTCCCCTCGGCG  
929  
930 >probe\_24  
931 CTAGGCTGTGCTGCCAACTGGATCCTGCGCGGGACGTCCTTTGTTTACGTCCCCTCGGCGCTGAATCCCGCGG  
932 ACGACCCCTCTCGGGGTCGCTTGGGGCTCTATCGCCCCCTTCTCCGT  
933  
934 >probe\_25  
935 CTGAATCCCGCGGACGACCCCTCTCGGGGTCGCTTGGGGCTCTATCGCCCCCTTCTCCGTCTGCCGTTCCGGC  
936 CGACGACGGGGCGCACCTCTTTACGCGGACTCCCCGTCTGTGCCT  
937  
938 >probe\_26  
939 CTGCCGTTCCGGCCGACGACGGGGCGCACCTCTTTACGCGGACTCCCCGTCTGTGCCTTCTCATCTGCCGG  
940 ACCGTGTGCACTTCGCTTACCTCTGCACGTCGCATGGAGACCACCG  
941  
942 >probe\_27

943 TCTCATCTGCCGGACCGTGTGCACTTCGCTTACCTCTGCACGTGCGATGGAGACCACCGTGAACGCCCTCAG  
944 AGCTTGCCAAAGGTCTTACATAAGAGGACTCTTGGACTTTCAGCAA  
945  
946 >probe\_28  
947 TGAACGCCCTCAGAGCTTGCCAAAGGTCTTACATAAGAGGACTCTTGGACTTTCAGCAAGGTCAACGACCGGG  
948 ATTGAGGAATACATCAAAGACTGTGTATTTAAGGACTGGGAGGAGT  
949  
950 >probe\_29  
951 GGTCAACGACCGGGATTGAGGAATACATCAAAGACTGTGTATTTAAGGACTGGGAGGAGTTGGGGGAGGAGAT  
952 TAGGTTAAAGGTCTTTGTATTAGGAGGCTGTAGGCATAAATTGGTCT  
953  
954 >probe\_30  
955 TGGGGGAGGAGATTAGGTTAAAGGTCTTTGTATTAGGAGGCTGTAGGCATAAATTGGTCTGTGCACCAGCACCA  
956 TGCAACTTTTTACCTCTGCCTAATCATCTCTTGTTCATGTCCTAC  
957  
958 >probe\_31  
959 GTGCACCAGCACCATGCAACTTTTTACCTCTGCCTAATCATCTCTTGTTCATGTCCTACTGTTCAAGCCTCCAAG  
960 CTGTGCCTTGGGTGGCTTTGGGGCATGGATAGAACAACCTTTGCC  
961  
962 >probe\_32  
963 TGTTCAAGCCTCCAAGCTGTGCCTTGGGTGGCTTTGGGGCATGGATAGAACAACCTTTGCCATATGGCCTTTTTGG  
964 CTTAGACATTGACCCTTATAAAGAATTTGGAGCTTCTGTGGAGTT  
965  
966 >probe\_33  
967 ATATGGCCTTTTTGGCTTAGACATTGACCCTTATAAAGAATTTGGAGCTTCTGTGGAGTTACTCTCGTTTTTGCT  
968 TCTGACTTCTTCCCGTCTGTTTCGGGACCTACTCGACACCGCTT  
969  
970 >probe\_34  
971 ACTCTCGTTTTTGCTTCTGACTTCTTCCCGTCTGTTTCGGGACCTACTCGACACCGCTTACGCCCTGTACCGGGA  
972 TGCTTAGAGTCACCTGAACATTGCACACCTAACCATACAGCACT  
973  
974 >probe\_35  
975 AGCCCTGTACCGGGATGCCTTAGAGTCACCTGAACATTGCACACCTAACCATACAGCACTCAGGCAAGCTATTC  
976 TGTGCTGGGGTGAATGACTCTGGCTACCTGGGTGGGCAATA  
977  
978 >probe\_36  
979 CAGGCAAGCTATTCTGTGCTGGGGTGAGTTAATGACTCTGGCTACCTGGGTGGGCAATAATTTGGAAGATCCAG  
980 CAGCCAGGATTTAGTAGTCAATTATGTCAATACTAATATGGGCCT  
981  
982 >probe\_37  
983 TTTGGAAGATCCAGCAGCCAGGGATTTAGTAGTCAATTATGTCAATACTAATATGGGCCTAAAAATCAGACA  
984 TTGTGGTTTACATTTCTGCCTTACTTTTGAAGAGAACTGT  
985  
986 >probe\_38  
987 AAAAATCAGACA  
988 TCTTTTGGAGTGTGGATTGCACTCCTCCTGCTTATAGACCACC  
989  
990 >probe\_39  
991 TCTTGAGTATTTGGTGTCTTTTGGAGTGTGGATTGCACTCCTCCTGCTTATAGACCACCAAATGCCCTATCCTA  
992 TCAACACTTCCGGAACTACTGTTGTTAGACGACGGGACCGAGG  
993  
994 >probe\_40  
995 AAATGCCCTATCCTATCAACACTTCCGGAACTACTGTTGTTAGACGACGGGACCGAGGCAGGTCCCCTAGAA  
996 GAAGAACTCCCTCGCCTCGCAGACGAAGATCTCAATCGCCGCGTCG

997  
998 >probe\_41  
999 CAGGTCCCCTAGAAGAAGAACTCCCTCGCCTCGCAGACGAAGATCTCAATCGCCGCGTGCAGAAAGATCTCAAT  
1000 CTCCAGCTTCCCAATGTTAGTATTCCCTTGACTCATAAGGTGGAA  
1001  
1002 >probe\_42  
1003 CAGAAGATCTCAATCTCCAGCTTCCCAATGTTAGTATTCCCTTGACTCATAAGGTGGGAACTTTACGGGGCTTT  
1004 ATTCTTCTACTGTACCTGTCTTTAATCCTGACTGGCAAACCTCCTT  
1005  
1006 >probe\_43  
1007 ACTTTACGGGGCTTTATTCTTCTACTGTACCTGTCTTTAATCCTGACTGGCAAACCTCCTTCTTTCTGATATTCAT  
1008 TTGCATCAAGACATGATAAAATAAATGTGAACAATTTGTAGGCC  
1009  
1010 >probe\_44  
1011 CTTTTCTGATATTCATTTGCATCAAGACATGATAAAATAAATGTGAACAATTTGTAGGCCCTCTCACAGAAAATGA  
1012 AAAGAGAAGATTAATAAATTATGCCAGCTAGATTTTATCCTA  
1013  
1014 >probe\_45  
1015 CTCTCACAGAAAATGAAAAGAGAAGATTAATAAATTATGCCAGCTAGATTTTATCCTAACGTTACCAATATTTG  
1016 CCTTTGGATAAAGGTATTAACCTTATTATCCAGAGAATGTAG  
1017  
1018 >probe\_46  
1019 ACGTTACCAAATATTTGCCTTTGGATAAAGGTATTAACCTTATTATCCAGAGAATGTAGTTAATCATTACTTCAAA  
1020 ACCAGACATTATTTACATACTCTATGGAAGGCGGGAATTCTAT  
1021  
1022 >probe\_47  
1023 TTAATCATTACTTCAAAACCAGACATTATTTACATACTCTATGGAAGGCGGGAATTCTATATAAGAGAGAAACCAC  
1024 ACGTAGCGCCTCATTTTGTGGGTCAACATATTCTTGGGAACAAG  
1025  
1026 >probe\_48  
1027 ATAAGAGAGAAACCACACGTAGCGCCTCATTTTGTGGGTCAACATATTCTTGGGAACAAGAGCTACAGCATGGG  
1028 AGCACCTCGGTCAACGCCTCGAAGGGGCATGGGAAAGAATCTTTCT  
1029  
1030 >probe\_49  
1031 AGCTACAGCATGGGAGCACCTCGGTCAACGCCTCGAAGGGGCATGGGAAAGAATCTTTCTGTGCCCAATCCTCT  
1032 GGGATTCTTTCCAGACCACCAGTTGGATCCAGCATTCCAGAGCAAAT  
1033  
1034 >probe\_50  
1035 GTGCCCAATCCTCTGGGATTCTTTCCAGACCACCAGTTGGATCCAGCATTCCAGAGCAAATCCAGCAGTCCAGAT  
1036 TGGGACTTCAACACAAACAAGGACAATTGGCCAGAGGCAAACAAG  
1037  
1038 >probe\_51  
1039 TCCAGCAGTCCAGATTGGGACTTCAACACAAACAAGGACAATTGGCCAGAGGCAAACAAGGTAGGAGTGGGAG  
1040 GCTTCGGTCCAGGGTTCACACCCCCACACGGAGGCTTCTGGGGTGG  
1041  
1042 >probe\_52  
1043 GTAGGAGTGGGAGGCTTCGGTCCAGGGTTCACACCCCCACACGGAGGCTTCTGGGGTGGAGCCCTCAGGCA  
1044 CAGGGCATACTAACAACCTTGCCAGCAGATCCGCCTCCTGCCTCCACC  
1045  
1046 >probe\_53  
1047 AGCCCTCAGGCACAGGGCATACTAACAACCTTGCCAGCAGATCCGCCTCCTGCCTCCACCAATCGGCGGTGAG  
1048 GAAGGAAGCCAACCCAGTCTCTCCACCTTAAGAGACACTCATCCA  
1049  
1050 >probe\_54

1051 AATCGGCGGTCAGGAAGGAAGCCAACCCAGTCTCTCCACCTCTAAGAGACTCATCCACAGGCCATGCAGT  
1052 GGAACTCAACACAGTTCCACCAAGCTCTGCAAGATCCGAGAGTAAGG  
1053  
1054 >probe\_55  
1055 CAGGCCATGCAGTGGAACCTCAACACAGTTCCACCAAGCTCTGCAAGATCCGAGAGTAAGGGCCTGTATTTTCC  
1056 TGCTGGTGGCTCCAGTTCAGAAACAGAGAACCCTGTTCCGACTATT  
1057  
1058 >Deletion\_region1903\_1939\_removed probe  
1059 TCTTGTTTCATGTCCTACTGTTCAAGCCTCCAAGCTGTGCCTTGGGTGGCTTTGGGGCATGGACATTGACCCTTAT  
1060 AAAGAATTTGGAGCTTCTGTGGAGTTACTCTCGTTTTTGCCTTCT  
1061  
1062 >Deletion\_Genotype\_D\_region2897\_2929\_removed probe  
1063 ACGTAGCGCATCATTTTGCGGGTCAACATATTCTTGGGAACAAGAGCTACAGCATGGGAGCGAATCTTTCTGTTC  
1064 CCAACCCCTCTGGGATTCTTTCCCGATCATCAGTTGGACCCTGCAT  
1065  
1066 >H\_cons\_seq\_s2035\_e2154\_ConS2035  
1067 CGAACATTGCACCCCAACCACACTGCTCTCAGGCAAGCTATTTTGTGCTGGGGTGAGTTGATGACCTTGGCTT  
1068 CCTGGGTGGGCAATAATTTAGAGGATCCTGCAGCAAGAGATCTAGT  
1069  
1070 >G\_cons\_seq\_s2845\_e2964\_ConS2845  
1071 TTTGTGGGTCACCATATACTTGGGAACAAGATCTACAGCATGGGGCTTTCTTGGACGGTCCCTCTCGAGTGGGG  
1072 AAAGAACCTTTCCACCAGCAATCCTCTAGGATTCCTTCCCGATCAC  
1073  
1074 >G\_cons\_seq\_s1651\_e1770\_ConS1651  
1075 TATATAAGAGGACTCTTGGACTGTTTGTATATGTCACAACCGGGGTGGAGAAATACTTCAAGGACTGTGTTTTTG  
1076 CTGAGTGGGAAGAATTAGGCAATGAGTCCAGGTTAATGACCTTTG  
1077  
1078 >E\_cons\_seq\_s1975\_e2094\_ConS1975  
1079 TTCAGTAAGAGATCTTCTAGATACCGCCTCAGCTCTGTATCGGGATGCCTTAGAATCTCCTGAGCATTGTTACC  
1080 TCACCACACTGCACTCAGGCAAGCCATTCTTTGCTGGGGGGAACCT  
1081  
1082 >A\_cons\_seq\_s391\_e510\_Target\_seq391  
1083 TTTTATCATATTCCTCTTCATCCTGCTGCTATGCCTTAGCTCTGTATCGGTTCTTCTGAAGCCTTAGAGTCTCCAG  
1084 AGCATTGCTCCCCTCACCTCAGGATCCACAACAACCAAGTACGGG  
1085  
1086 >A\_cons\_seq\_s2875\_e2994\_ConS2875  
1087 CCTCGCAAAGGCATGGGGACGAATCTTCTGTTCCCAACCCTCTGGGATTCTTTCCCGATCATCAGTTGGACCCT  
1088 GCATTCCGAGCCAACCTCAAACAATCCAGATTGGGACTTCAACCCCT  
1089  
1090 >Genotype\_D\_deletion\_at\_33\_55  
1091 CACTCATCCTCAGGCCATGCAGTGGAACCTCCACAACCTTCCACCAAACCTCTGCAAGATCCCCCTGCTGGTGGCT  
1092 CCAGTTCAGGAACAGTAAACCCTGTTCCGACTACTGTCTCTCCCAT  
1093  
1094 >D\_cons\_seq\_s2956\_e3075\_ConS2956  
1095 AACAAGGACACCTGGCCAGACGCCAACAAGGTAGGAGCTGGAGCATTGGGGCTGGGATTACCCCCACCGCACC  
1096 GAGGCCTTTTGGGGTGGAGCCCTCAGGCTCAGGGCATACTACAAACC  
1097  
1098 >B\_cons\_seq\_s2095\_e2214\_ConS2095  
1099 AATGAATCTAGCCACCTGGGTGGGAAGTAATTTGGAAGATCCAGCATCCAGGGAATTAGTAGTCAGCTATGTCAA  
1100 CGTTAATATGGGCCTAAAAATCAGACAACCTATTGTGGTTTTCACAT  
1101  
1102 >B\_cons\_seq\_s1711\_e1830\_Target\_seq1711  
1103 AAGACTGTTTTGTTTAAAGACTGGGAGGAGTTGGGTTTACTGATTGGGGAGTTGGGGGATGTTCTAAGGGGATGG  
1104 AAGGCTAAATTGGTCTGTTCCACCAGCACCATGCAACTTTTTTCACCT

1105  
1106 >C\_cons\_seq\_s2990\_e3109\_ConS2990  
1107 ACAAGGATCACTGGCCAGAGGCAAATCAGGTAGGAGCGGGAGCATTGCGGCCAGGGTTCACCCCACACACG  
1108 GCGGTCTTTTGGGGTGGAGCCCTCAGGCTCAGGGCATATTGACAACAG  
1109  
1110 >C\_cons\_seq\_s3080\_e3199\_ConS3080  
1111 GCCCTCAGGCTCAGGGCATATTGACAACAGTGCCAGCAGCACCTCCTCCTGCCTCCACCAATCGGCAGTCAGG  
1112 AAGACAGCCTACTCCCATCTCTCCACCTCTAAGAGACAGTCATCCTC  
1113  
1114 >C\_cons\_seq\_s2629\_e2748\_ConS2629  
1115 AATTAATTATGCCTGCTAGGTTCTATCCTAACCTTACCAAATATTTGCCCTTGACAAAGGCATTAACCTTATTAT  
1116 CCTGAACATGCAGTTAATCATTACTTCAAACTAGGCATTATT  
1117  
1118 >C\_cons\_seq\_s1651\_e1770\_ConS1651  
1119 TACATAAGAGGACTCTTGGACTCTCAGCAATGTCAACGACCGACCTTGAGGCATACTTCAAAGACTGTTTGTTTA  
1120 AAGACTGGGAGGAGTTGGGGGAGGAGATTAGGTTAATGATCTTTG  
1121  
1122 >C\_cons\_seq\_s3080\_e3199\_Target\_seq3080  
1123 GCCCTCAGGCTCAGGGGACATTGACACCTCCGGCAGCCGCCCTCCTCCTGCCTCCAGAAAACCTCCTTCAGG  
1124 TTCTCCACCTACTCTAATTTCTTCTCCTCTAAGAGACAGTCATCCCA  
1125  
1126 >C\_cons\_seq\_s3140\_e3259\_ConS3140  
1127 AACCTCCTTCAGGTTCTCCACCTACTCTAATTTCTTCTCCTCTAAGAGACAGTCATCCCAACGCCATACACTGCCA  
1128 CTCCACGCTATTCCACCAAGTTCTGCGAGATCCCTTAGTTGCGG  
1129  
1130 >C\_cons\_seq\_s3200\_e3319\_ConS3200  
1131 AGGCCATGCAGTGGAACCTCCACAACATTCCACCAAGCTCTGCTAGATCCCAGAGTGAGGGGCCTATACTTTCTCCT  
1132 GCTGGTGGCTCCAGTTCCGGAACAGTAAACCCTGTTCCGACTACTG  
1133  
1134

1135 **Supplementary text**

1136

1137 **Determining HBV drug resistance and immune escape from sequences using HBV WGS**

1138 We were able to call polymorphisms at sites of previously reported resistance associated  
1139 mutations (RAMs) and vaccine escape mutations (VEMs) as defined by geno2pheno[37].  
1140 Polymorphisms were detected in RT and HBsAg regions. The polymorphism rt169M was  
1141 identified in viral sequences from two individuals (906116N/907395N) and 202R in one (HEP-  
1142 1763). The rt169 and rt202 are sites associated with HBV drug resistance however the mutations  
1143 169M and 202R have unknown significance. In the HBsAg region, a number of mutations  
1144 associated with HBsAg escape from vaccines and detection were identified (144E, 100C, 128V,  
1145 133I and 134V, each in one individual). All samples with polymorphisms had only been sequenced  
1146 with a single method, HEP-TILE Nanopore.
